# Supplementary material for: Pd-catalyzed [3 + 2] cycloaddition of vinylcyclopropanes with 1-azadienes: synthesis of 4-cyclopentylbenzo[e][1,2,3]oxathiazine 2,2-dioxides
Source: Royal Society of Chemistry journal article supplement (doi:10.1039/c8ra08881k), 2018-01-01
Supplement: c8ra08881k1.pdf [file c8ra08881k1.pdf]

## Electronic Supplementary Information

### **Pd-Catalyzed [3+2] Cycloaddition of Vinylcyclopropanes with 1-Azadienes: Synthesis of 4-Cyclopentylbenzo[*e*][1,2,3]oxathiazine 2,2-Dioxides**

Yan Lin, Qijun Wang, Yang Wu, Chang Wang, Hao Jia, Cheng Zhang, Jiaying Huang,\* and Hongchao  
Guo\*

Department of Applied Chemistry, China Agricultural University, Beijing 100193, P. R. China

Email: hchgao@cau.edu.cn, 05084@cau.edu.cn

### Contents

|                                                           |         |
|-----------------------------------------------------------|---------|
| Copies of <sup>1</sup> H and <sup>13</sup> C NMR Spectra  | S01–S17 |
| X-Ray Crystallographic Data of <b>3aa</b> and <b>3aa'</b> | S19–S38 |

# Copies of $^1\text{H}$ and $^{13}\text{C}$ NMR Spectra

## 2-vinylcyclopropane-1,1-dicarbonitrile (1a)

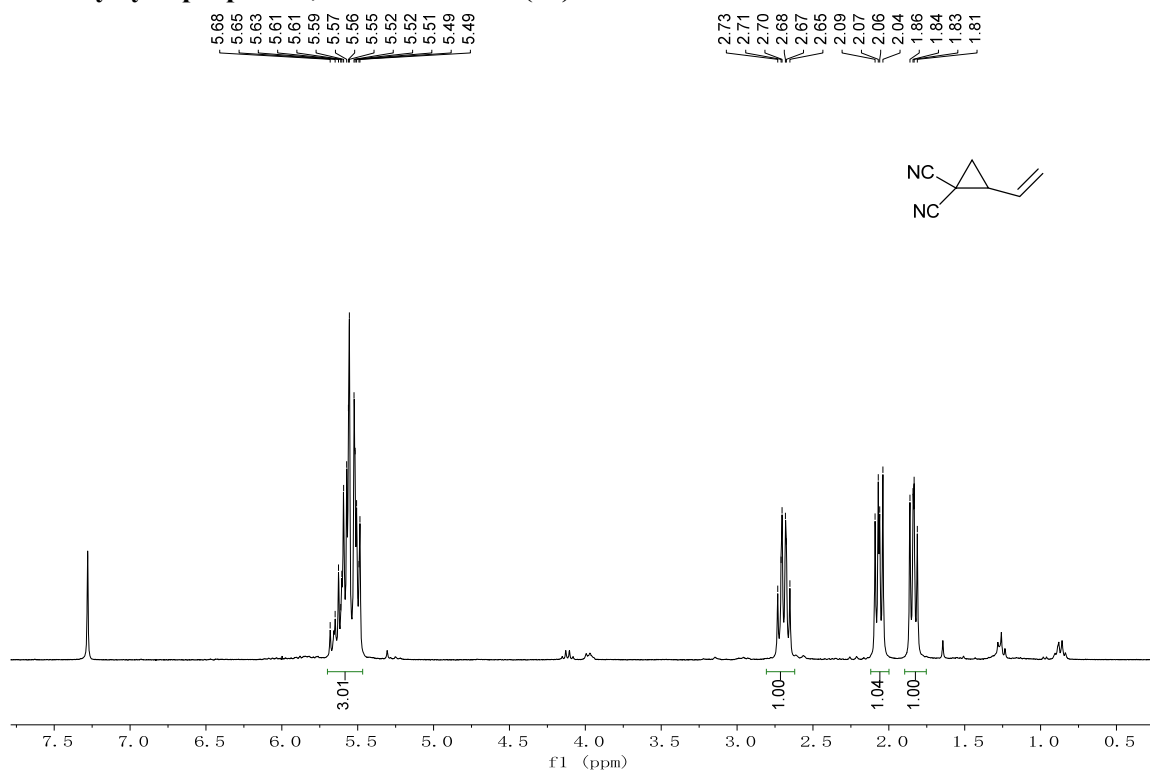

## (*E*)-4-(2-fluorostyryl)benzo[*e*][1,2,3]oxathiazine 2,2-dioxide (2b)

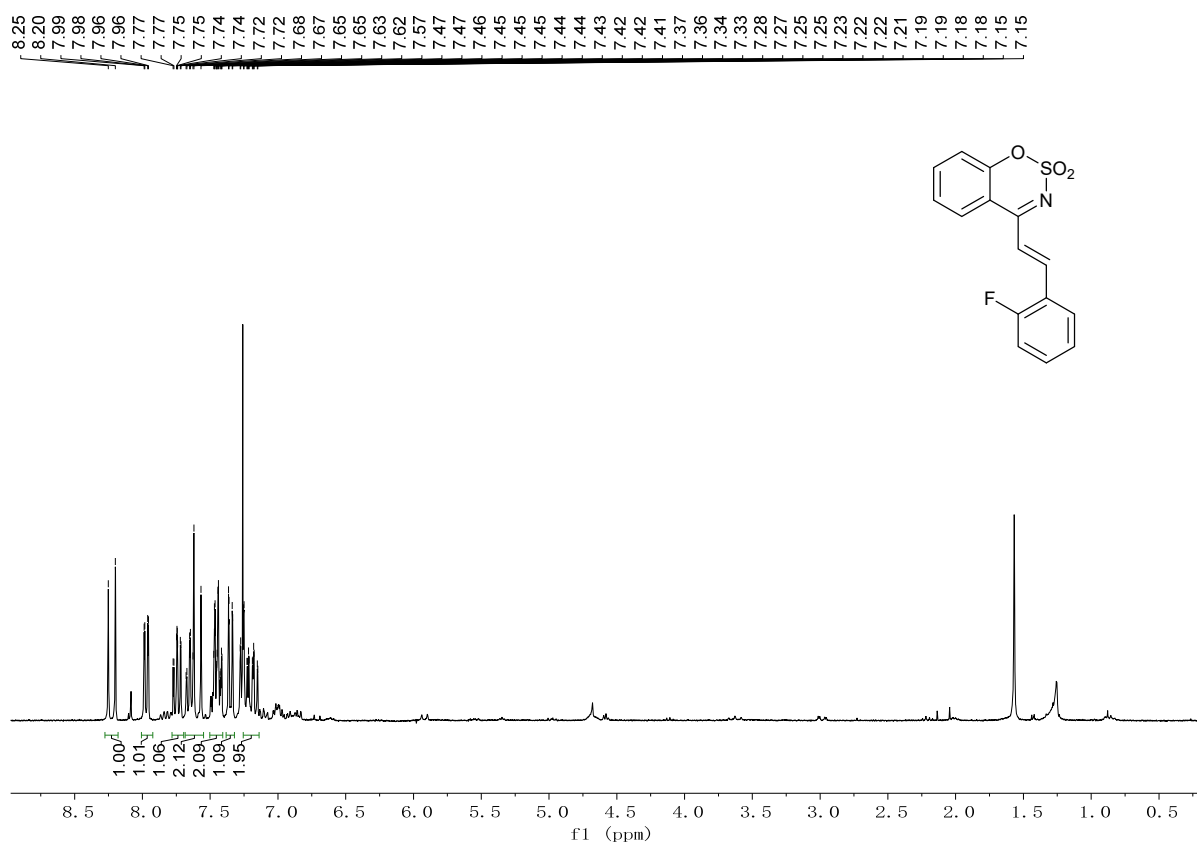

**(E)-4-(2-methoxystyryl)benzo[e][1,2,3]oxathiazine 2,2-dioxide (2j)**

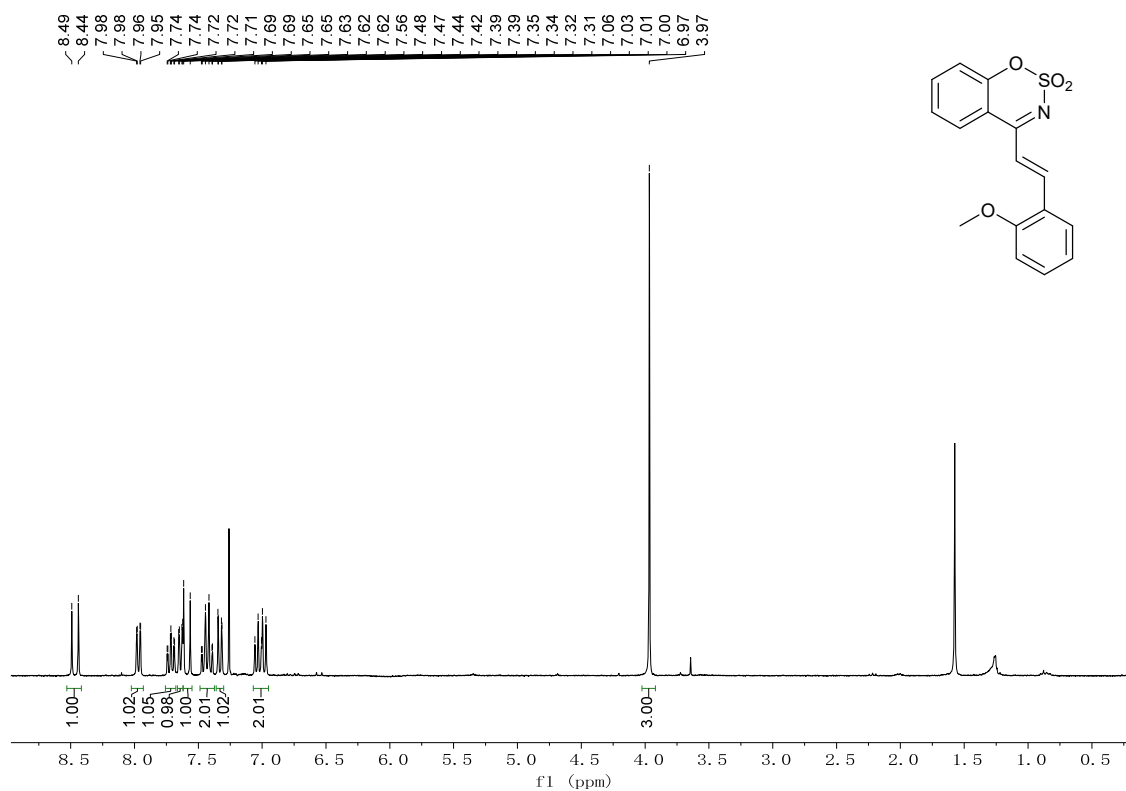

**(E)-6-methyl-4-styrylbenzo[e][1,2,3]oxathiazine 2,2-dioxide (2n)**

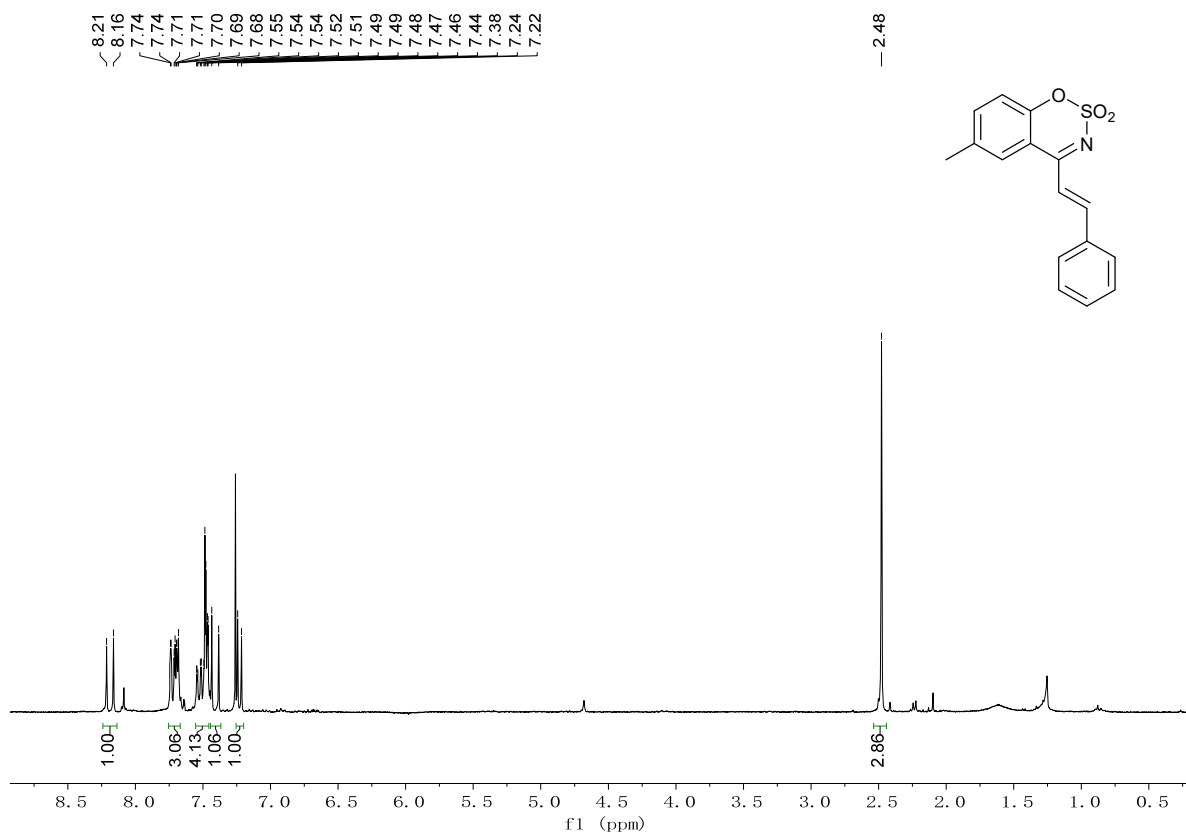

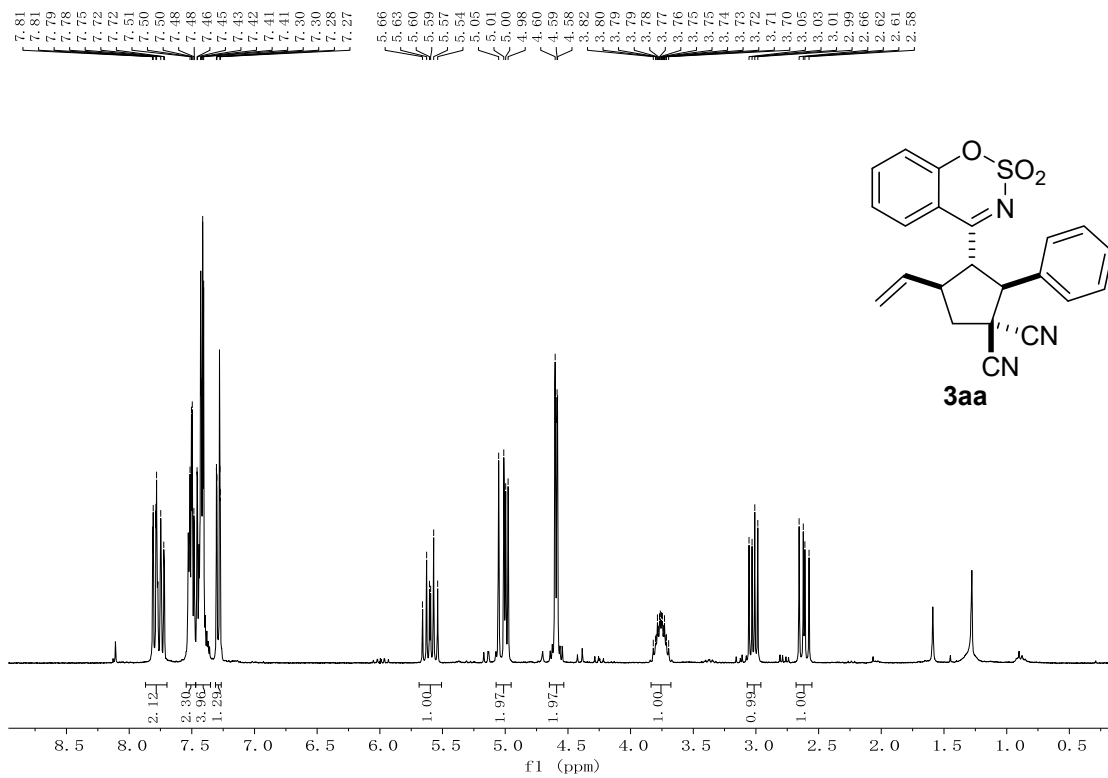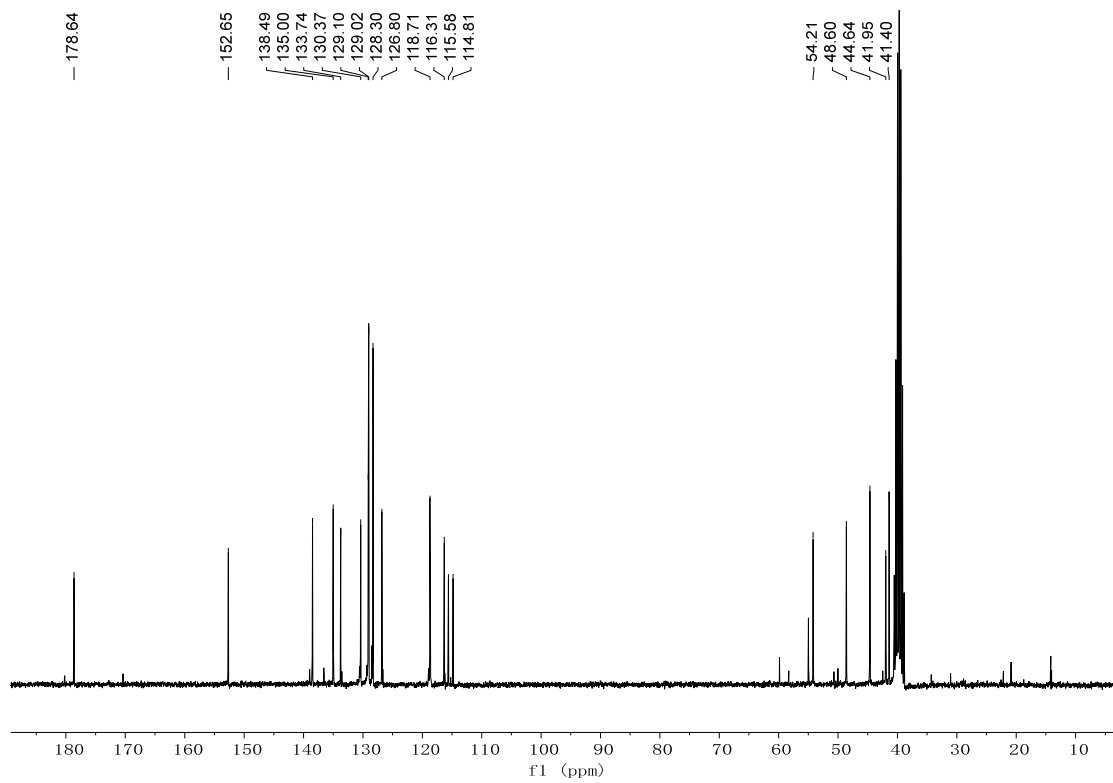

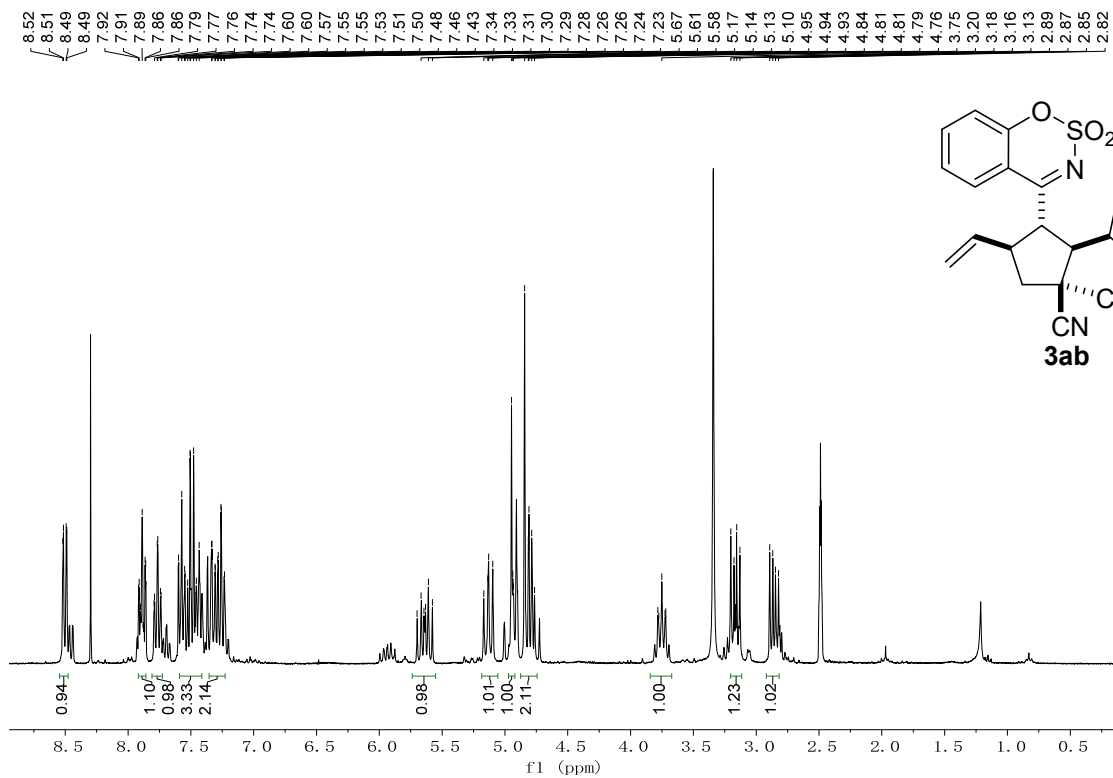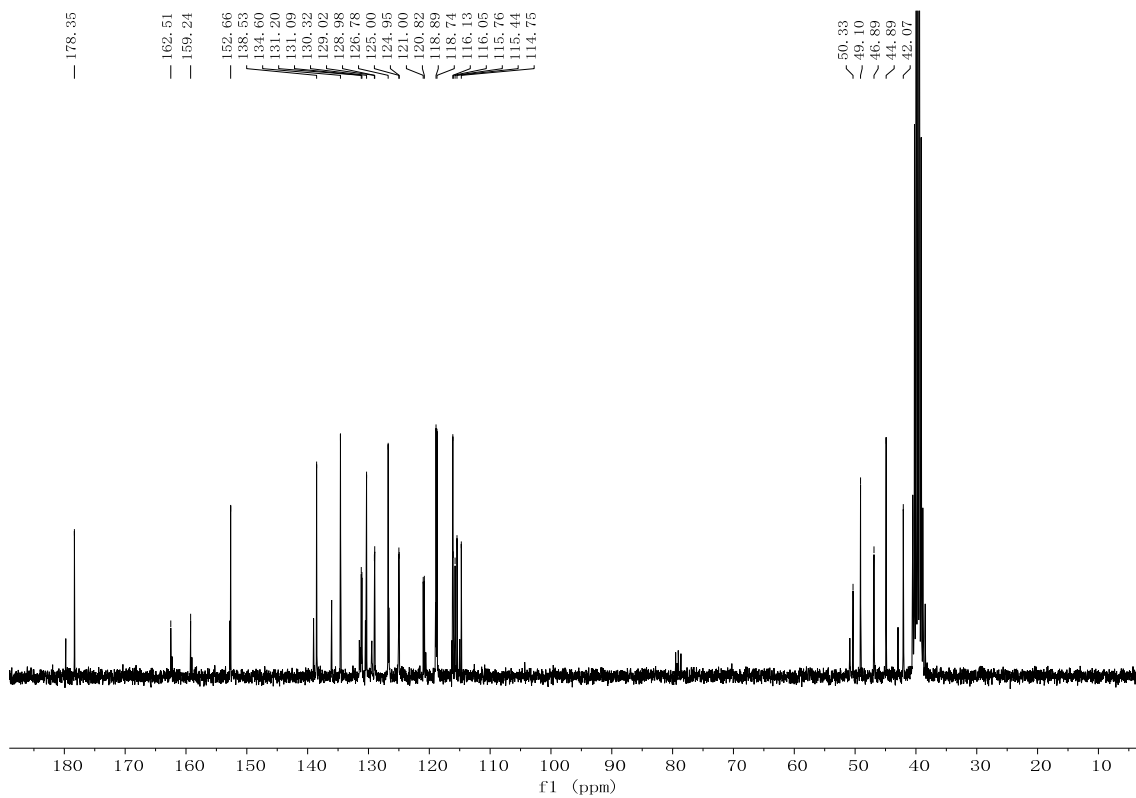

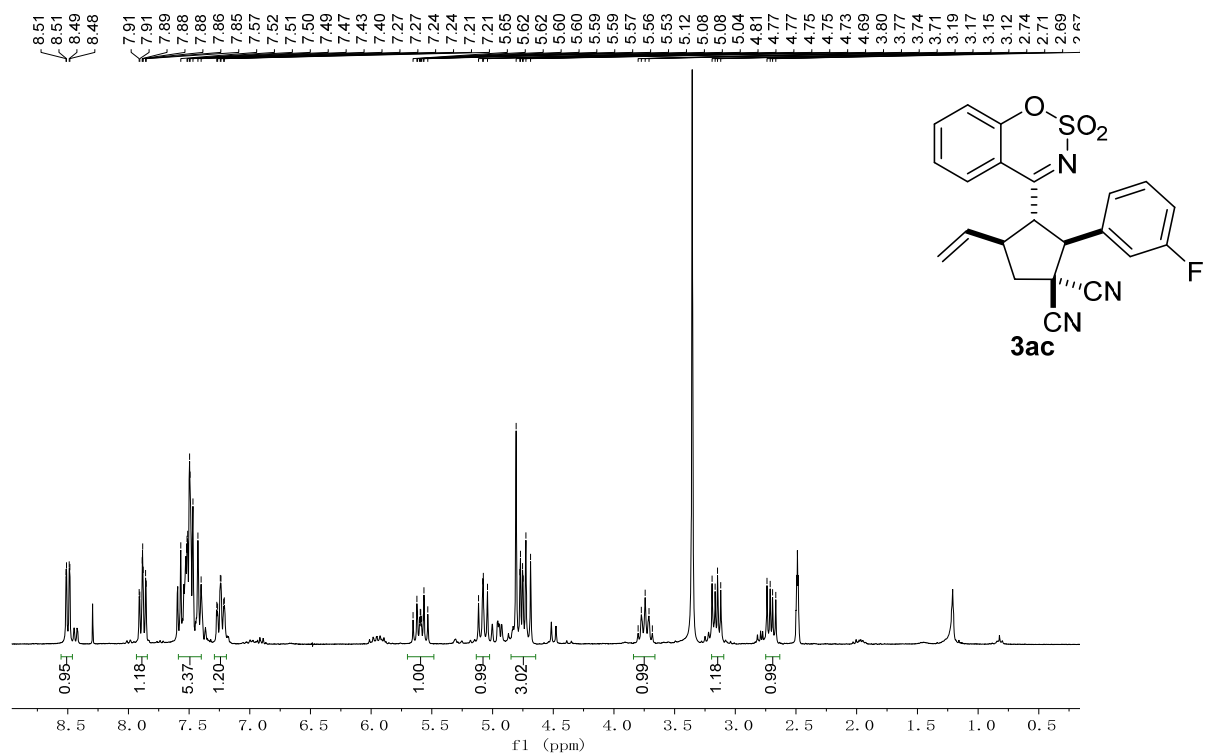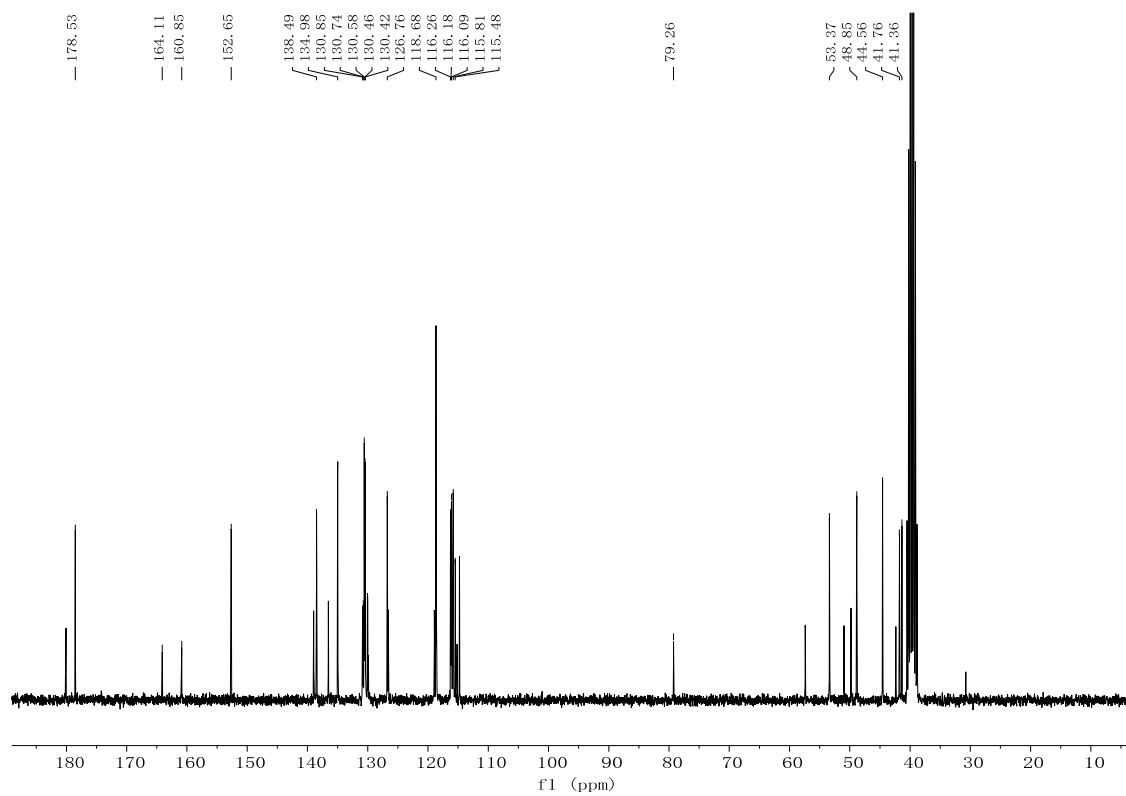

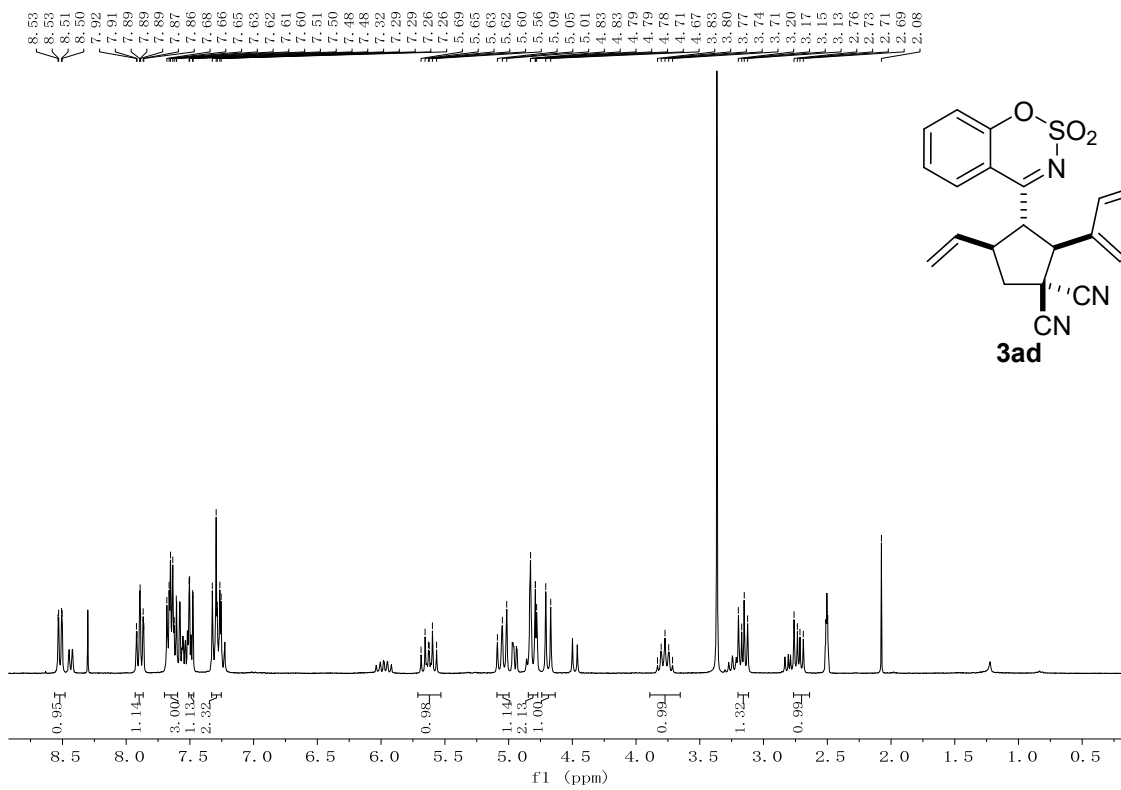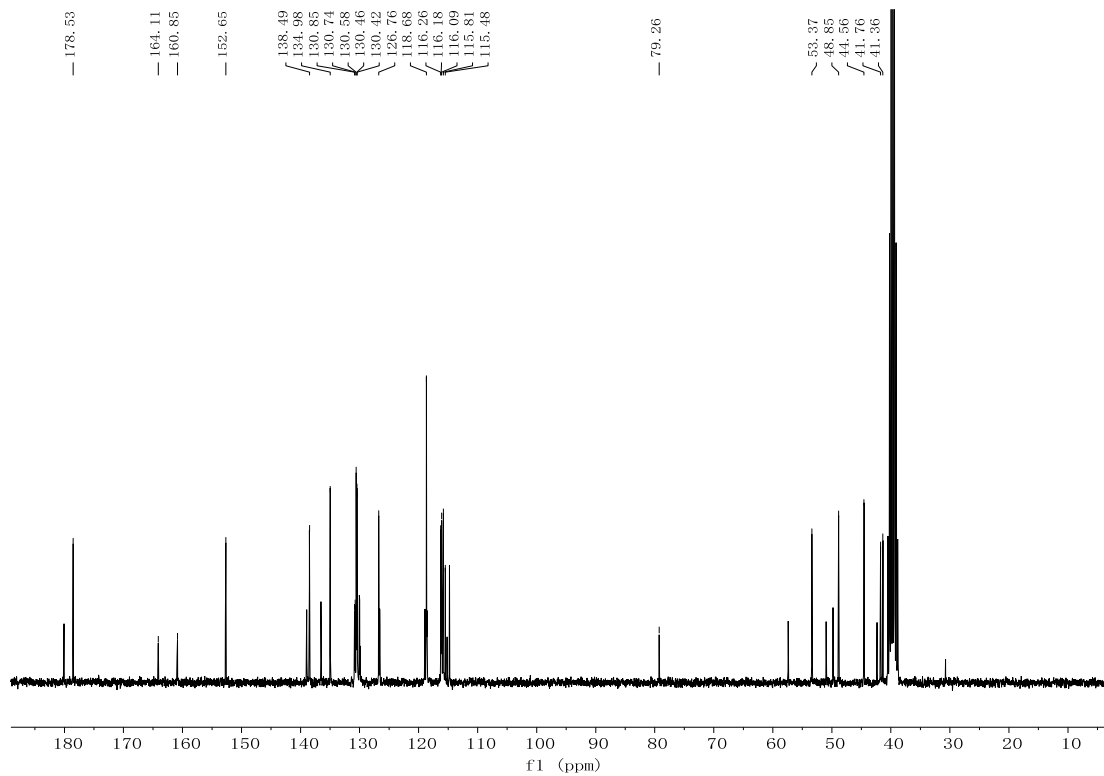

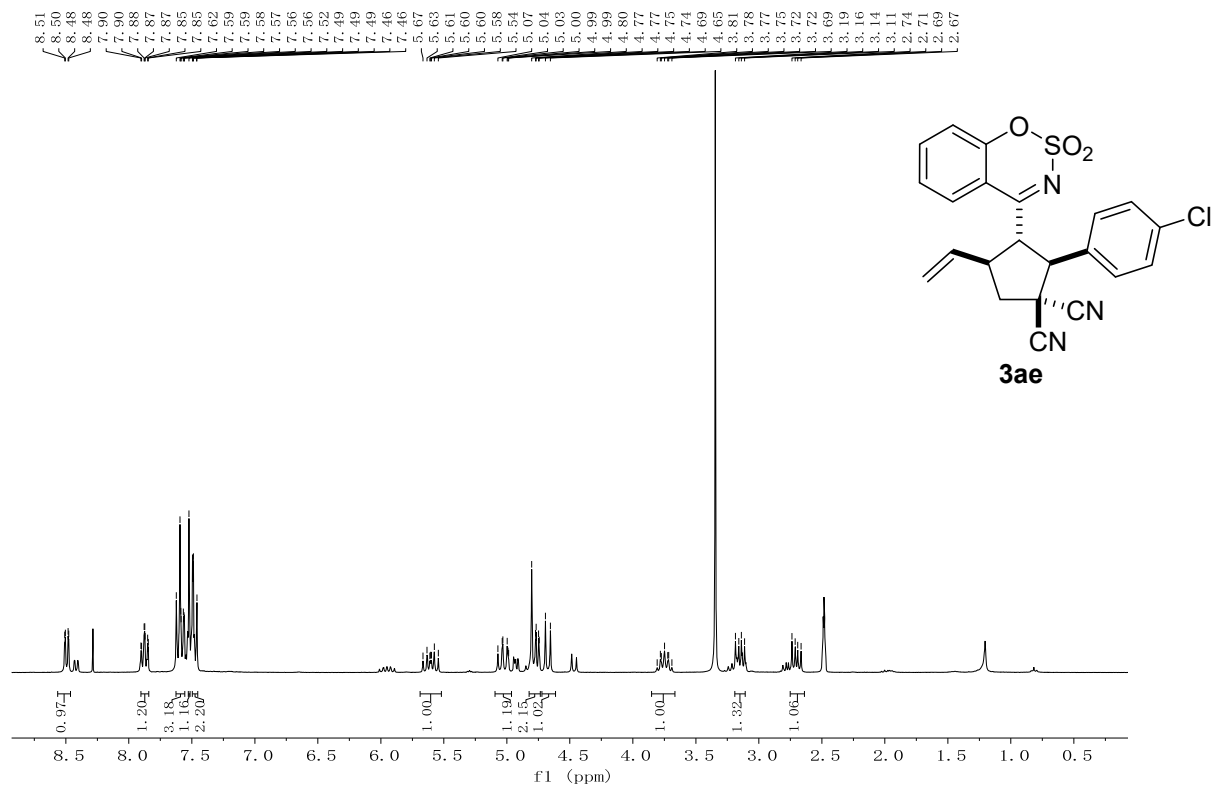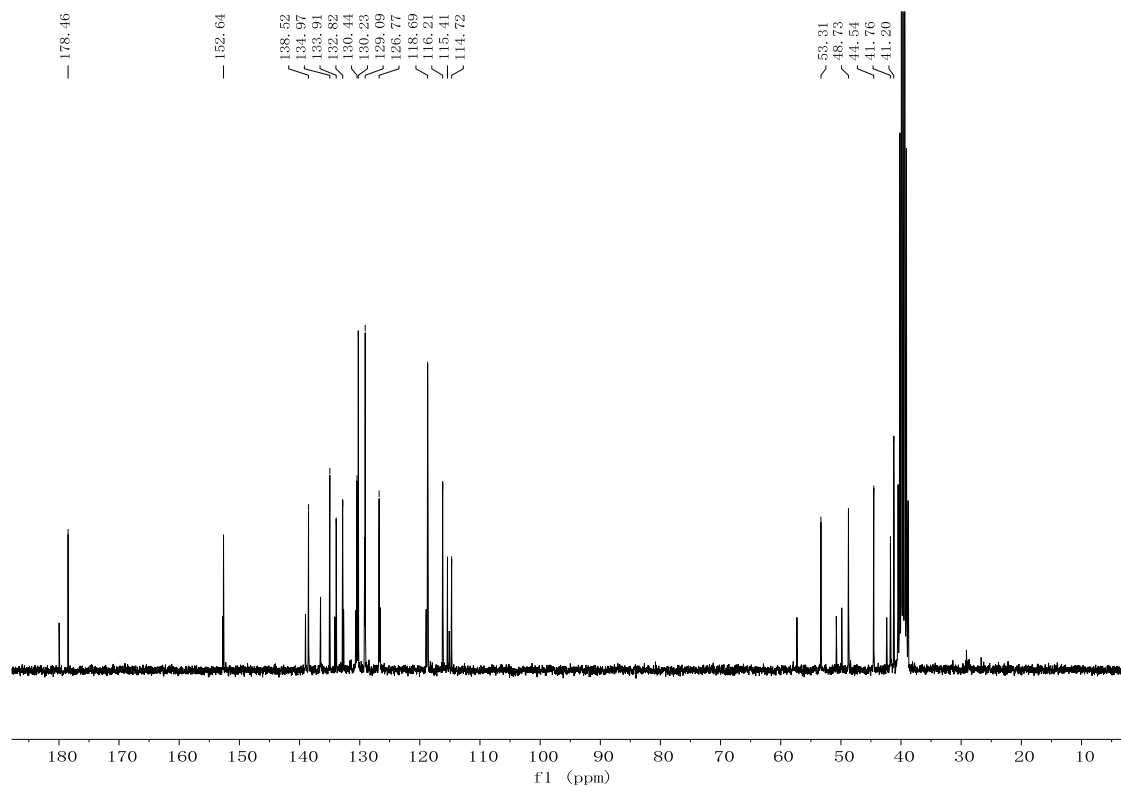



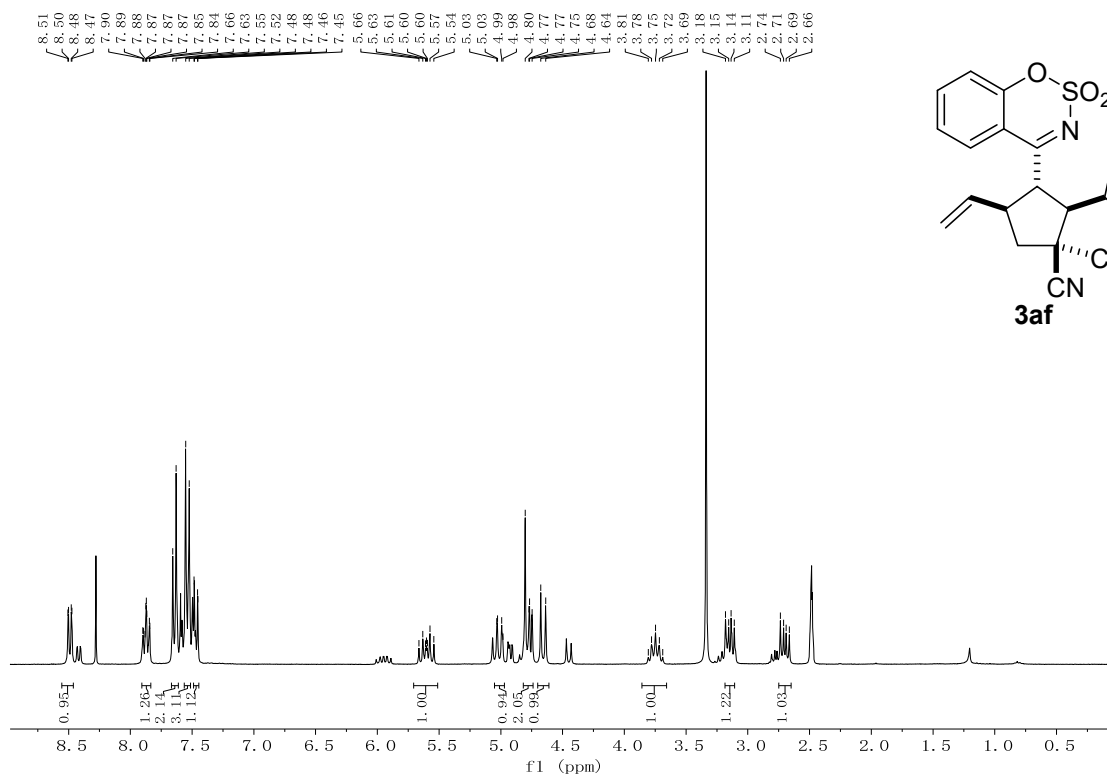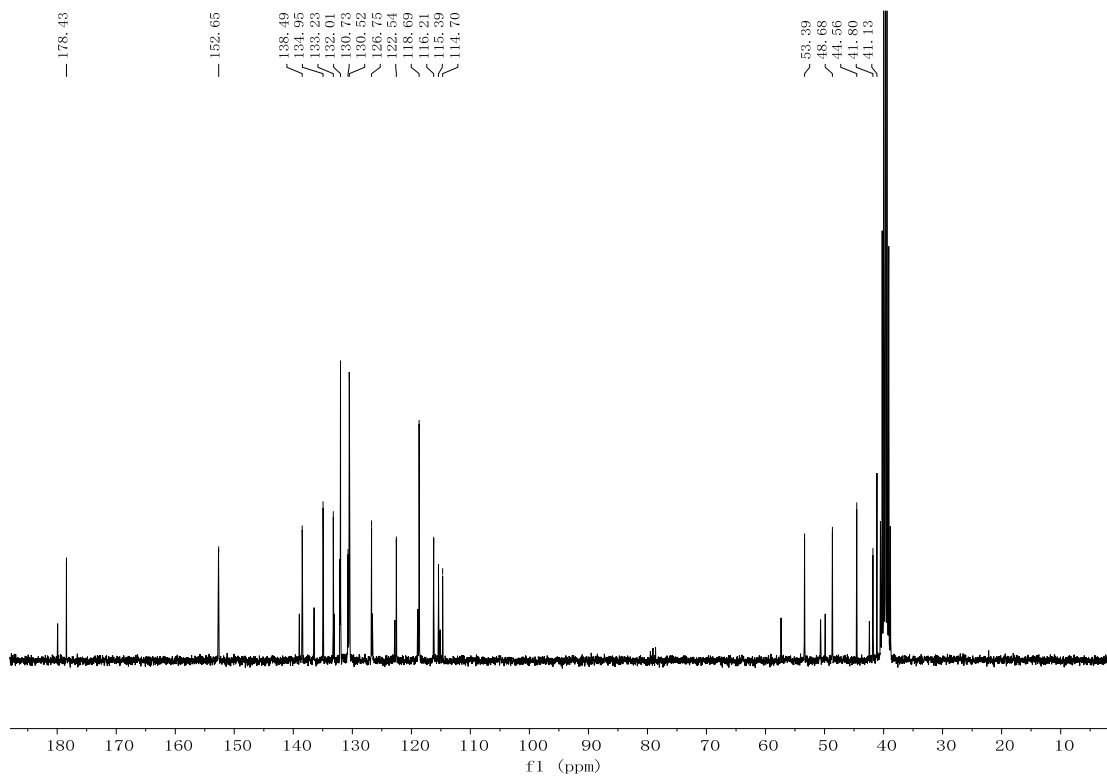

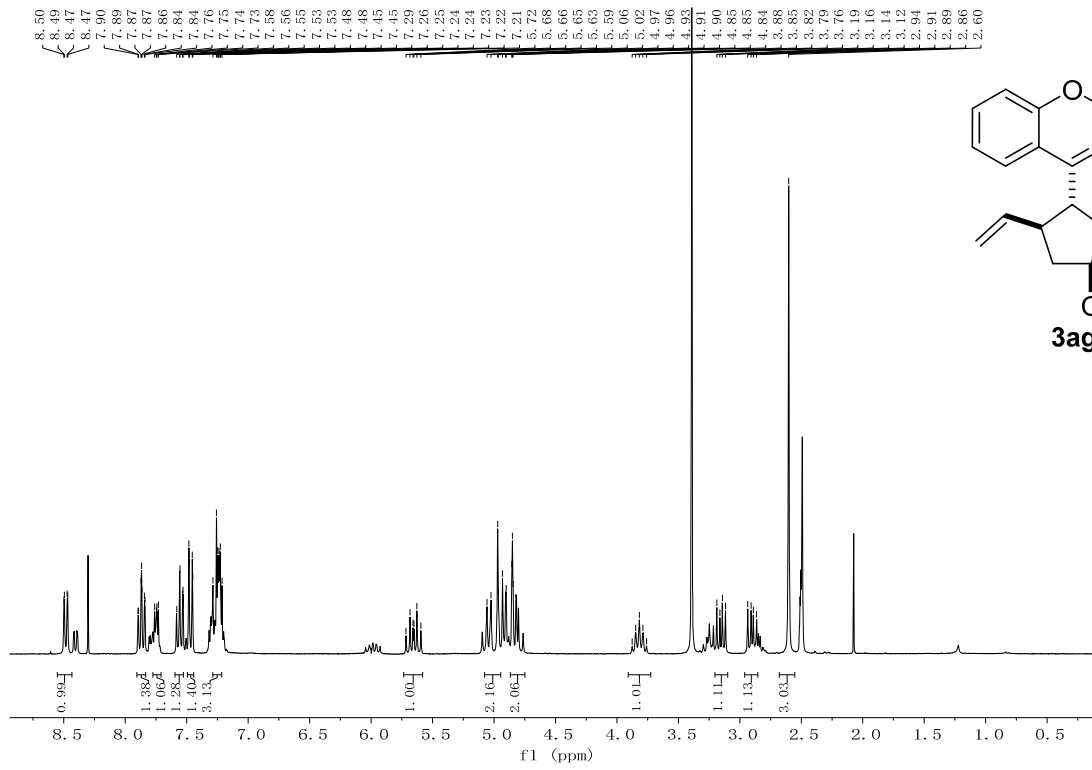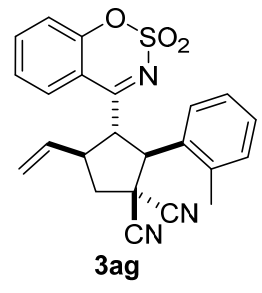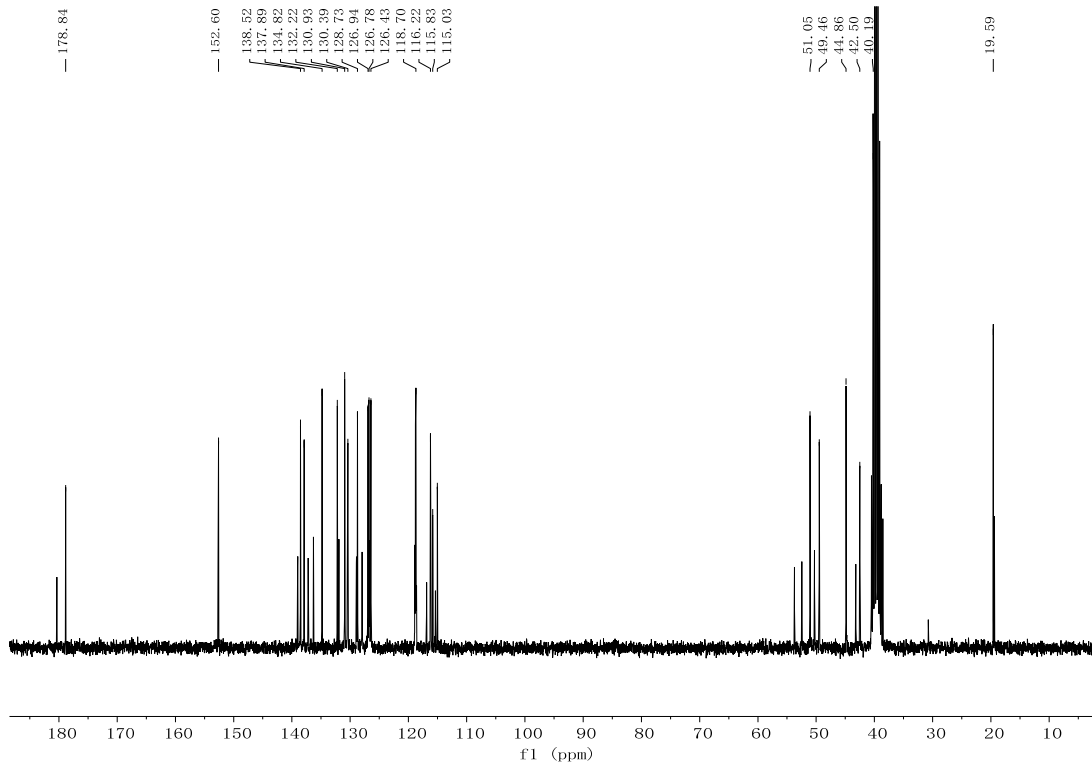

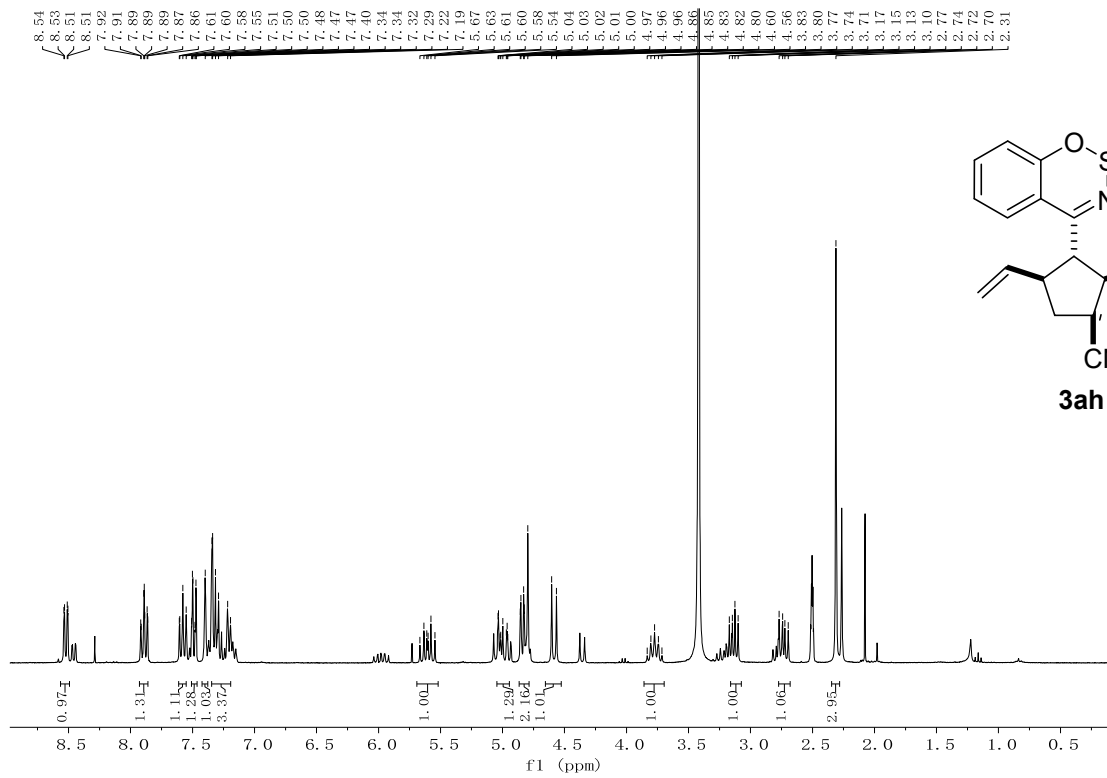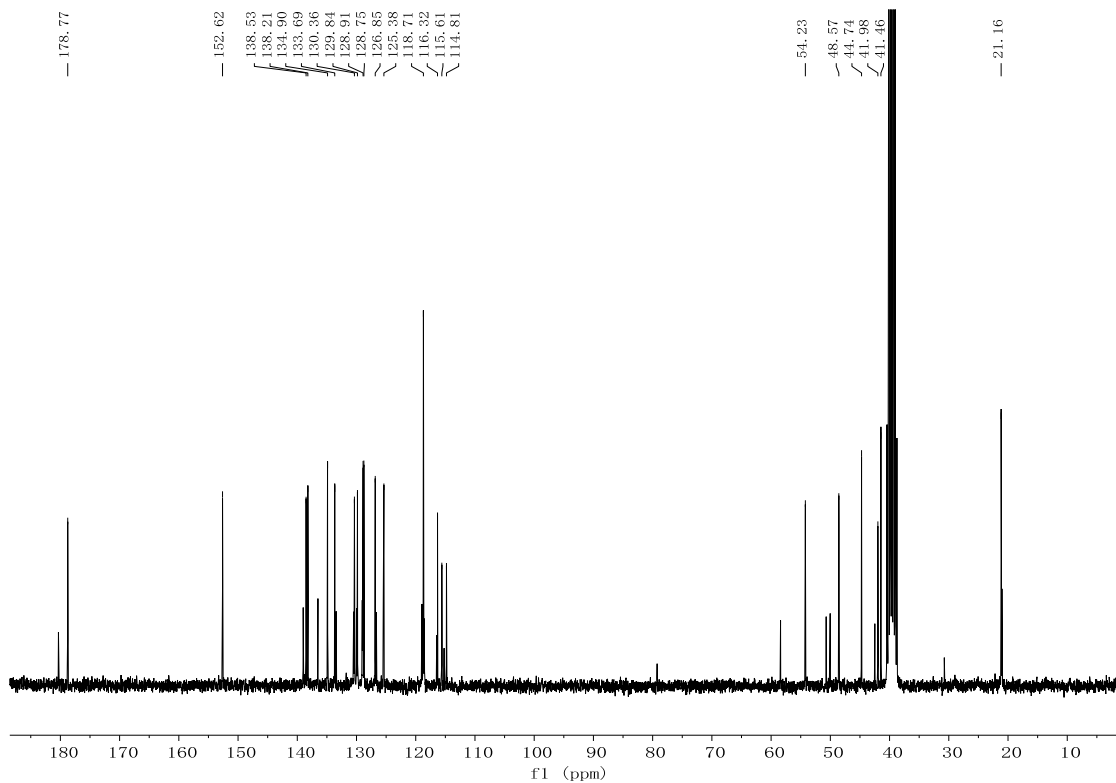

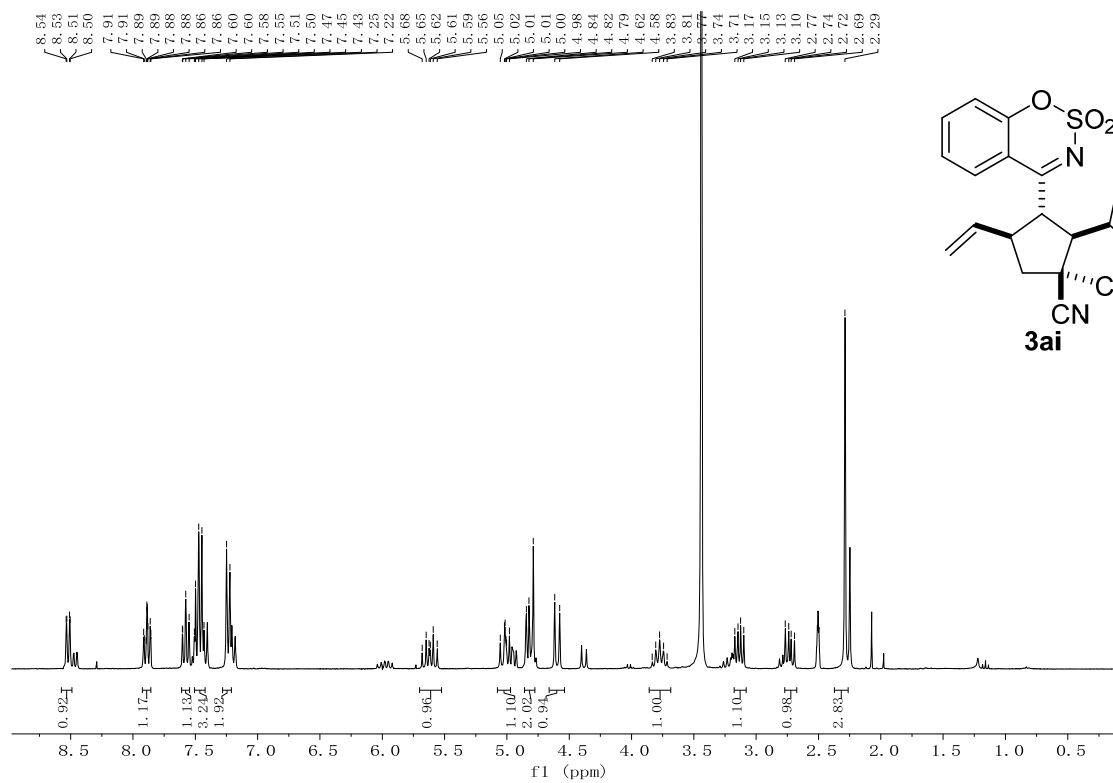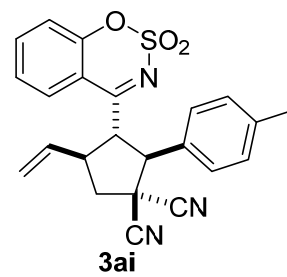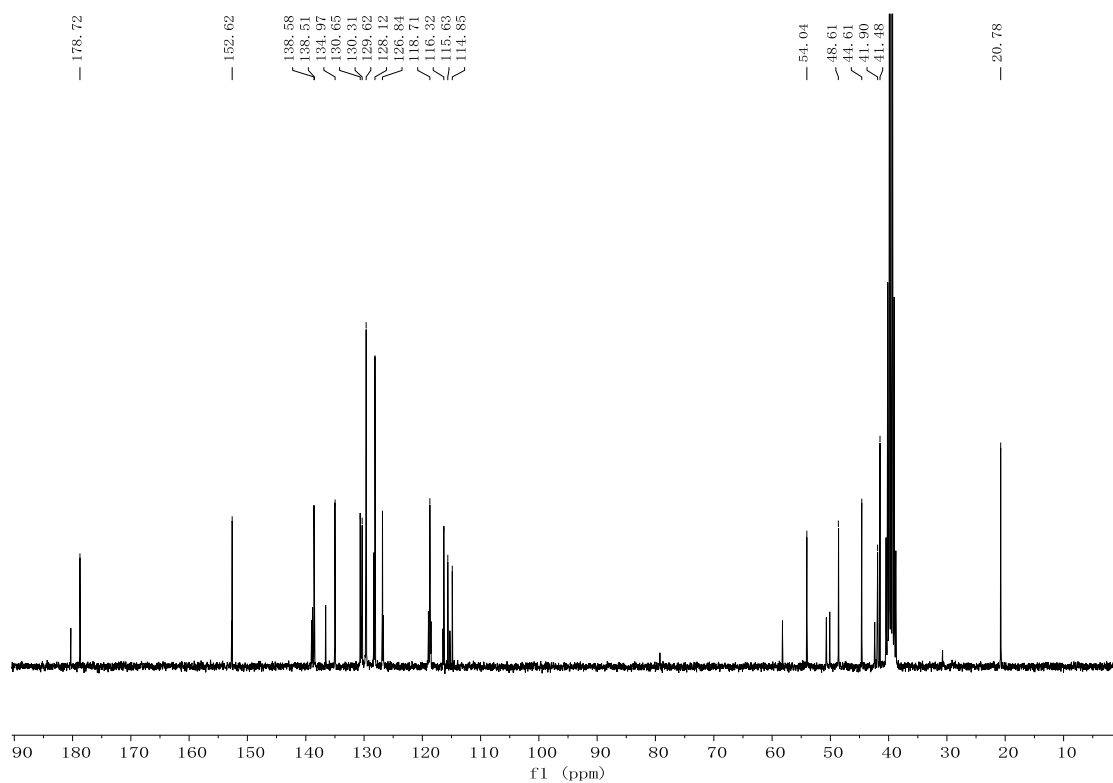

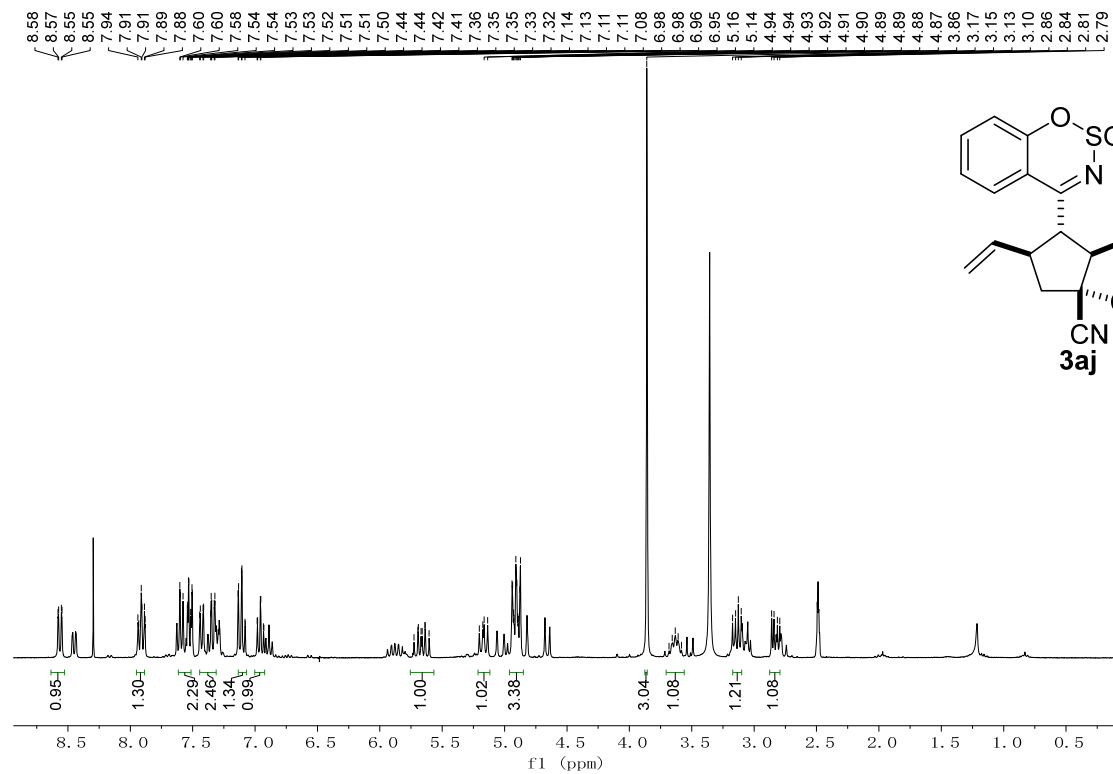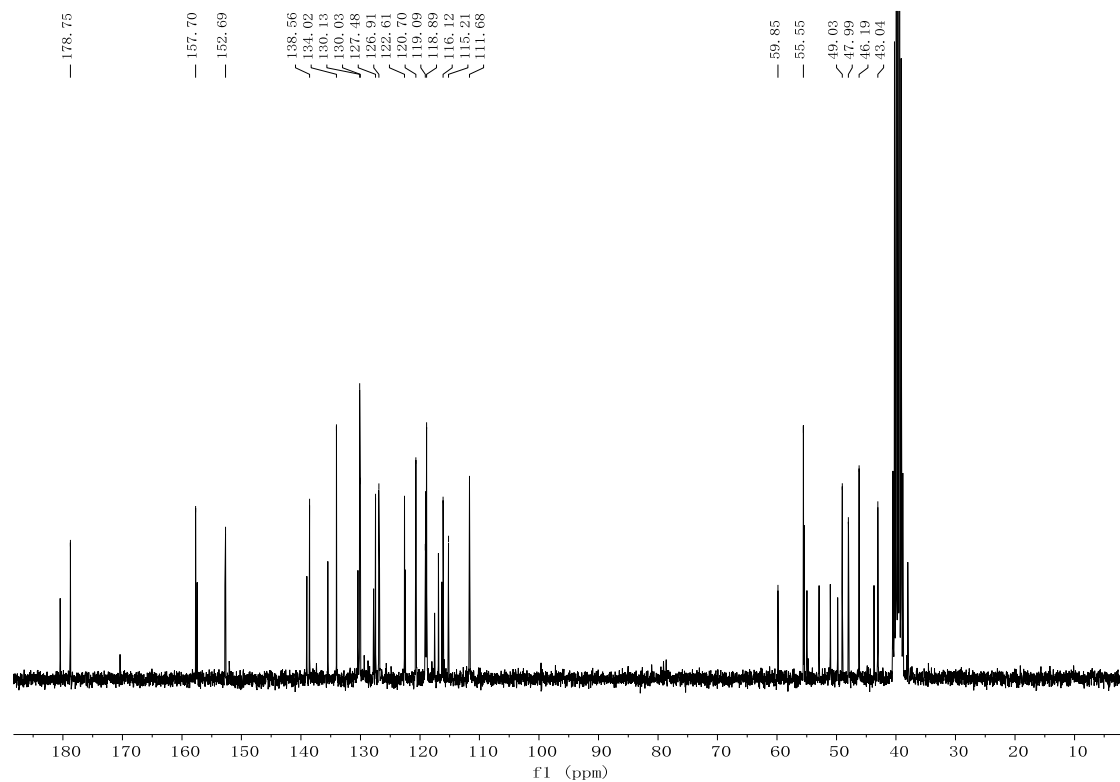

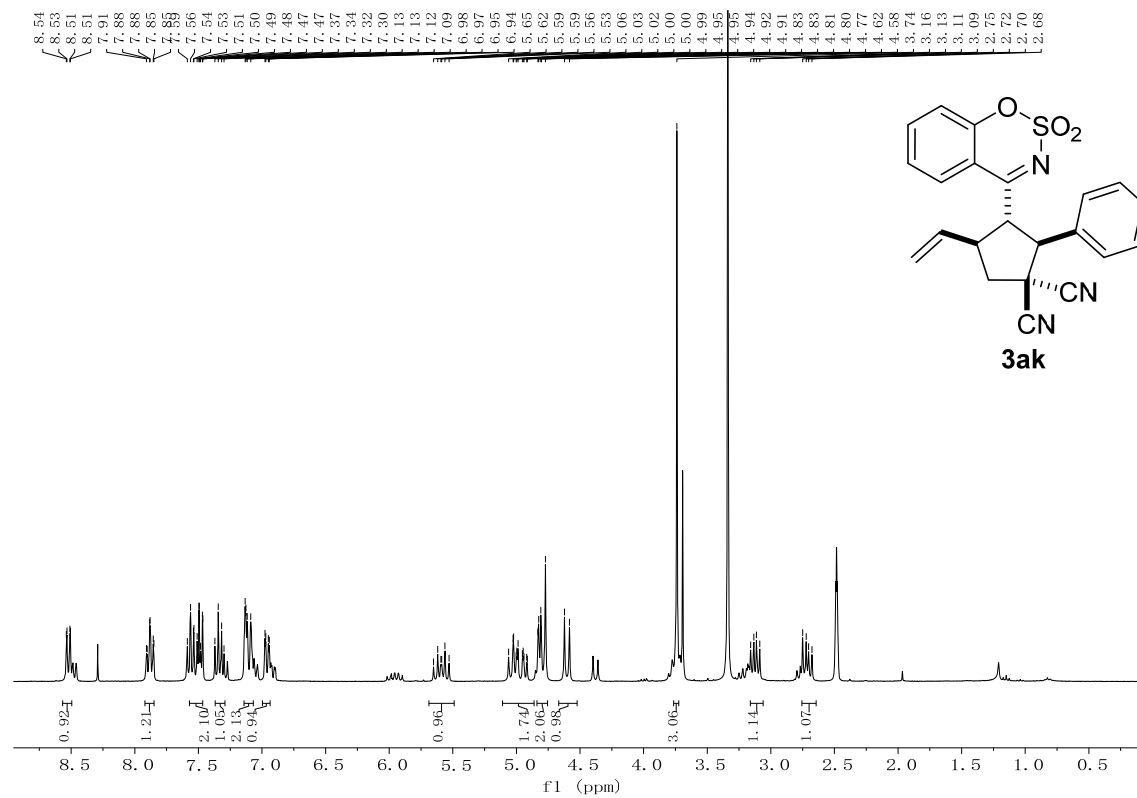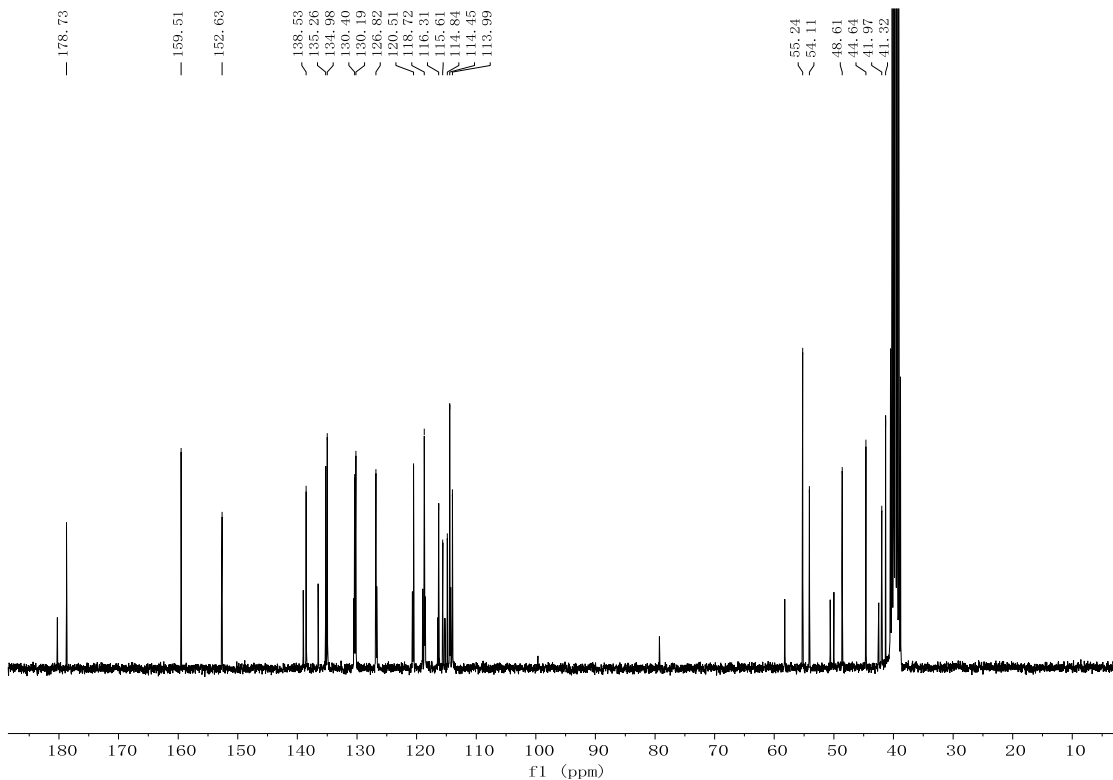

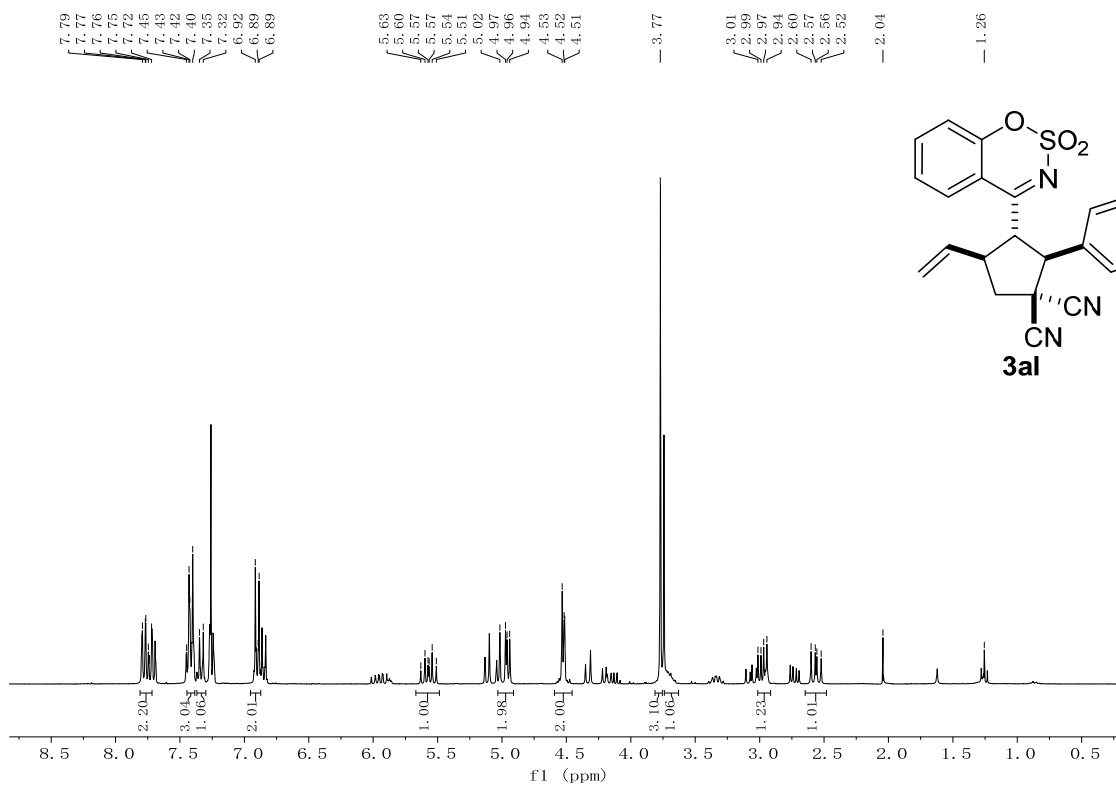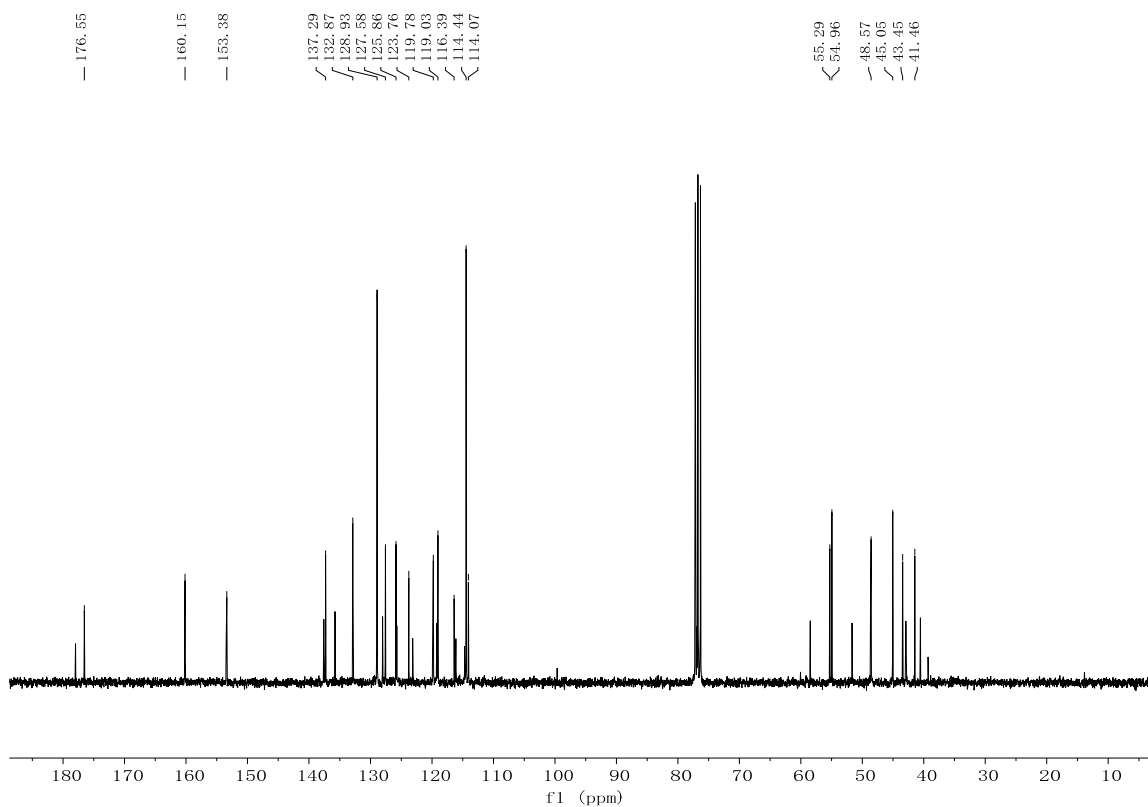

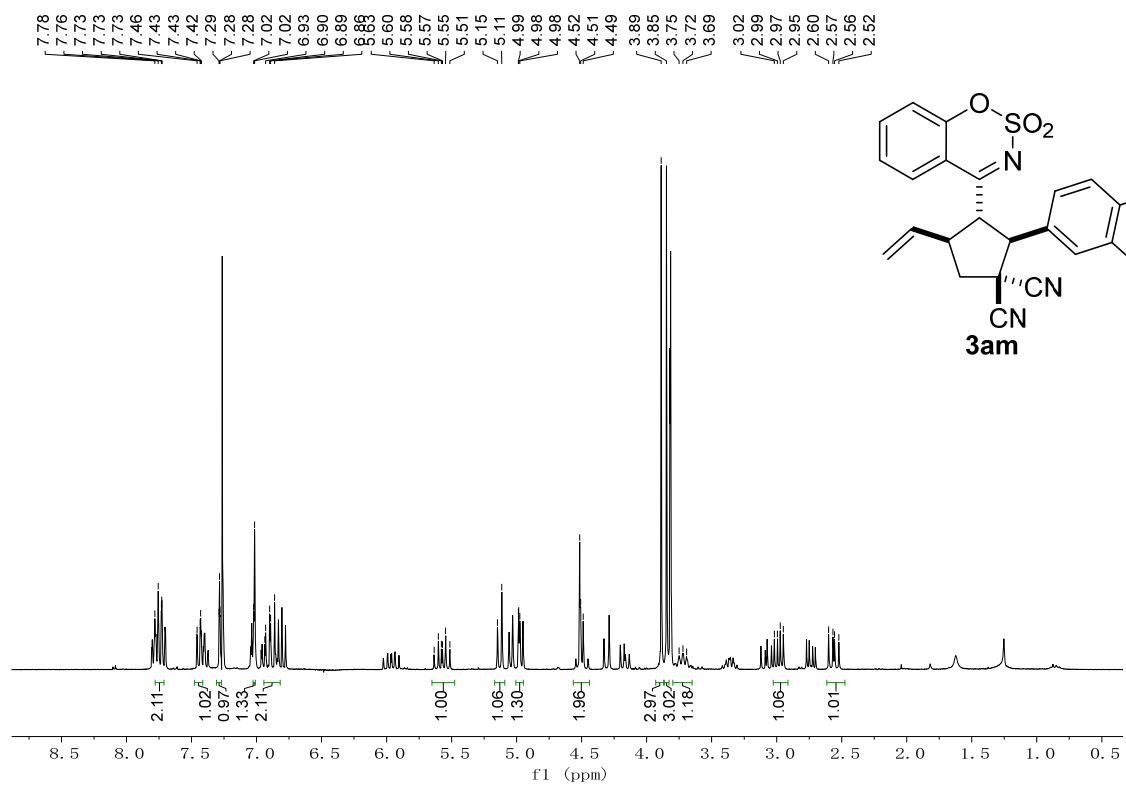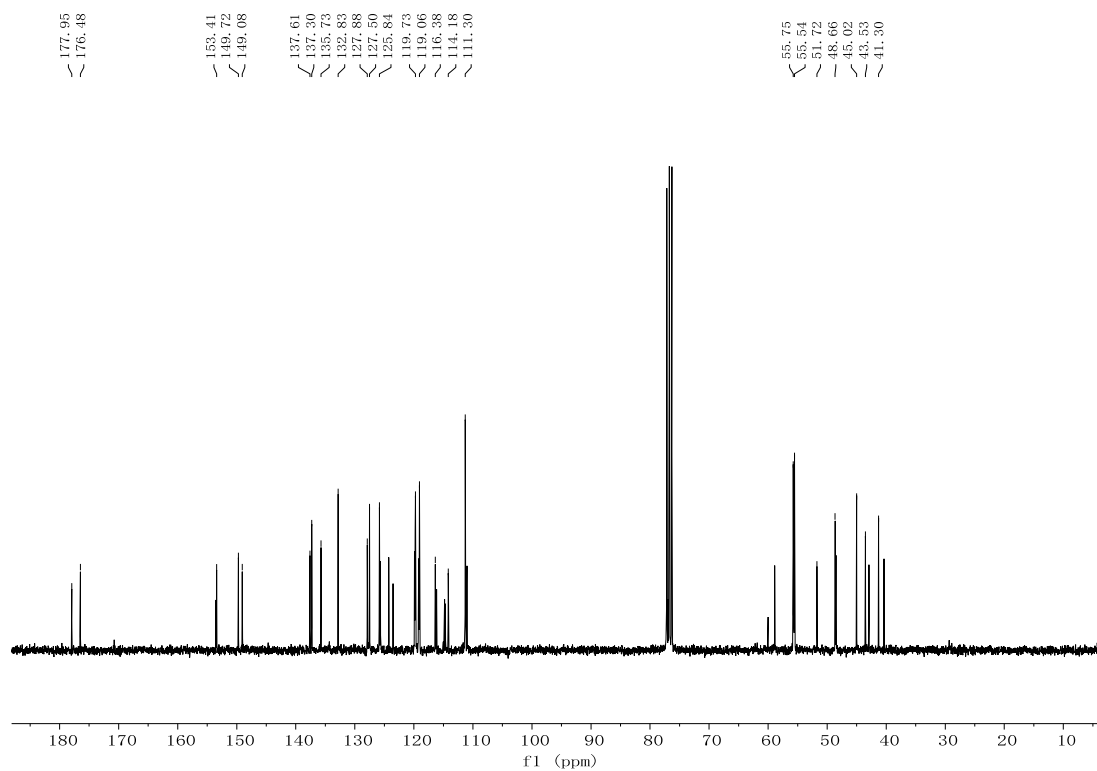



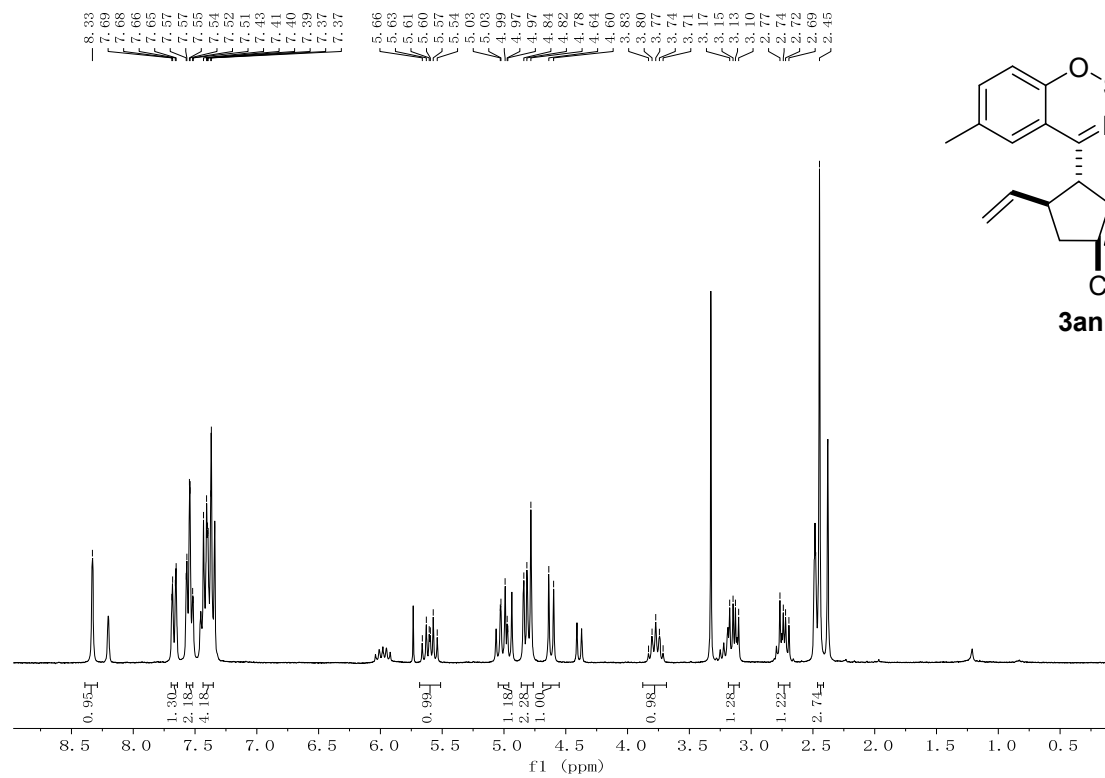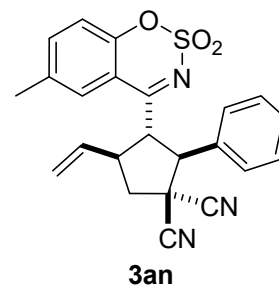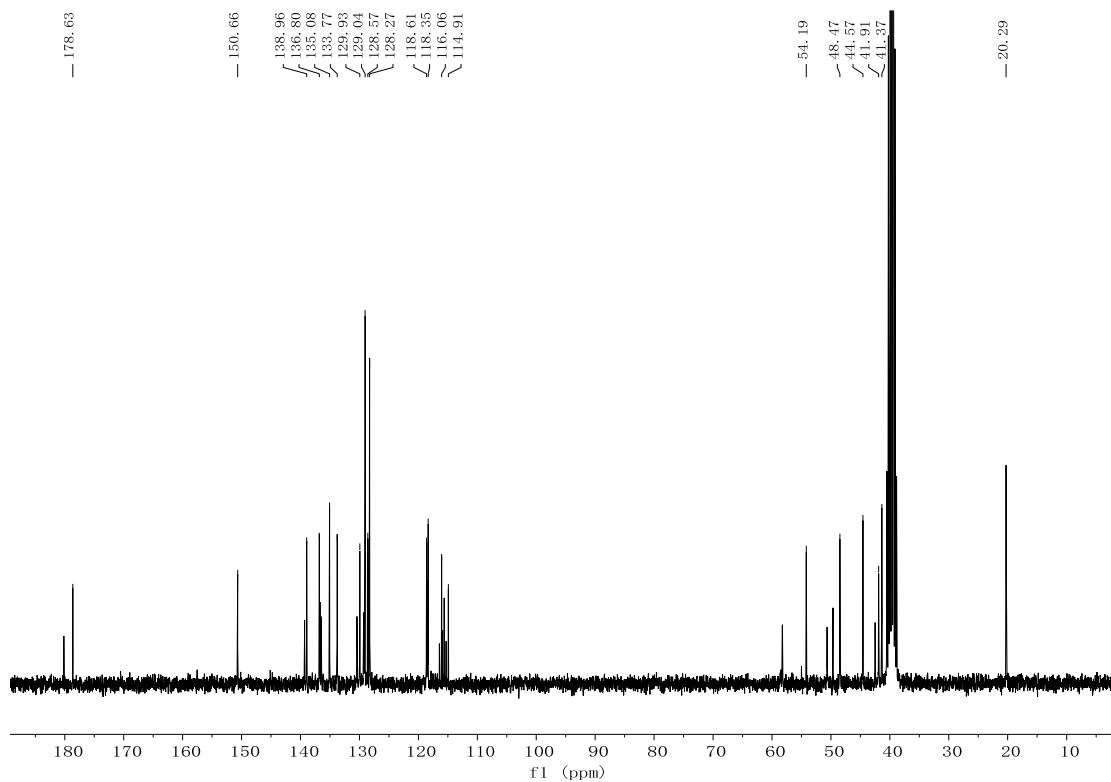

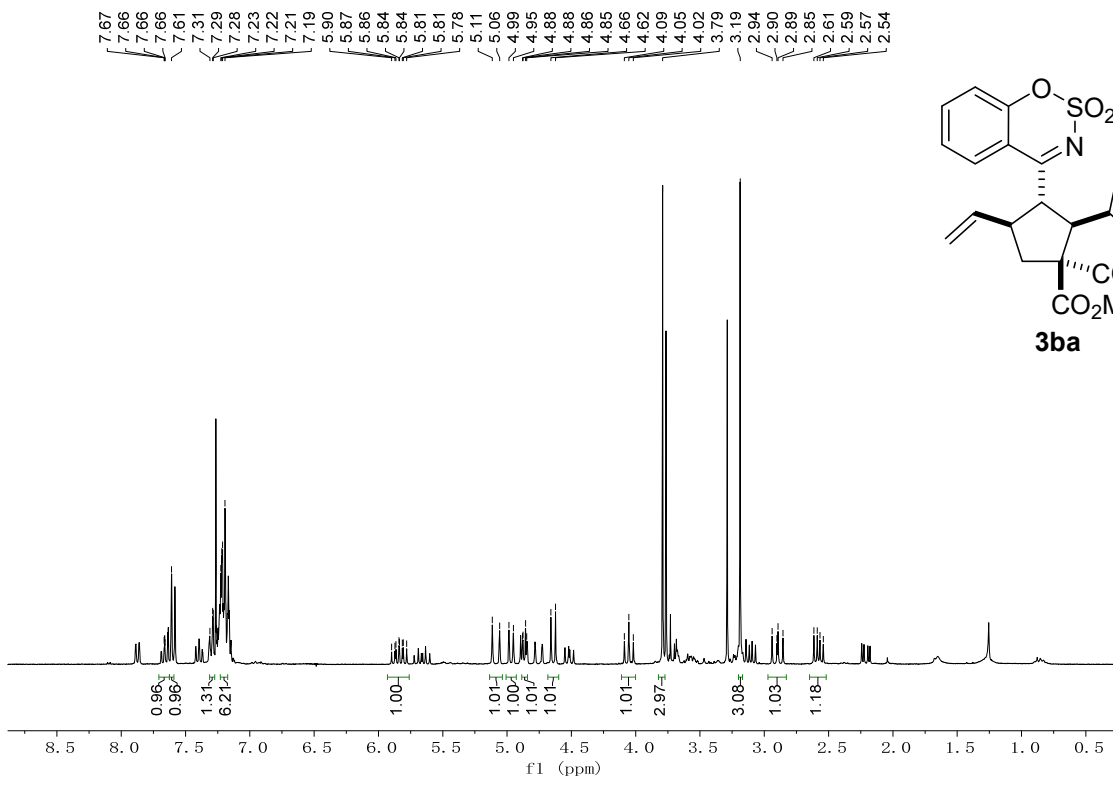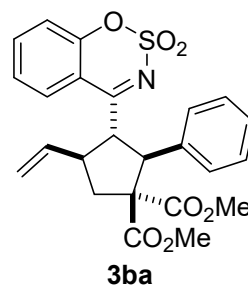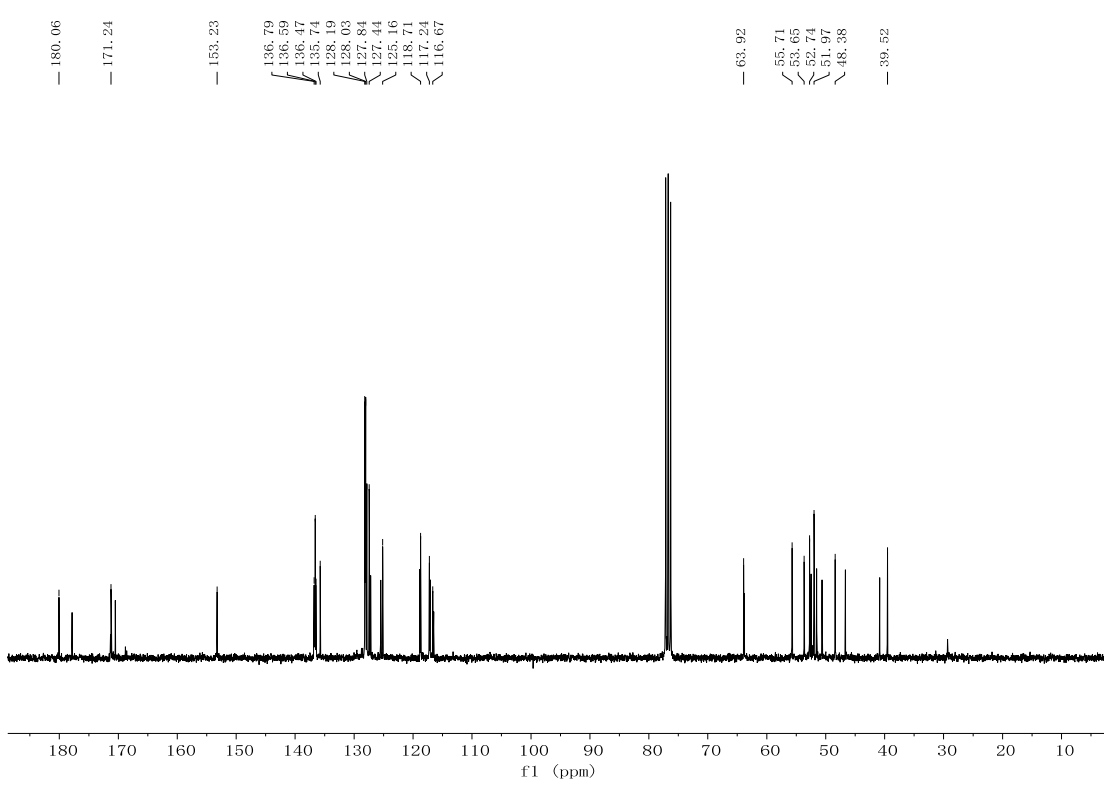

**X-Ray Crystallographic Data of 3-(2,2-dioxidobenzo[e][1,2,3]oxathiazin-4-yl)-2-phenyl-4-vinylcyclopentane-1,1-dicarbonitrile (3aa and 3aa’).**

Crystallographic data for **3aa** and **3aa’** have been deposited with the Cambridge Crystallographic Data Centre as deposition number CCDC 1849601 and 1849602. These data can be obtained free of charge via [www.ccdc.cam.ac.uk/data\\_request/cif](http://www.ccdc.cam.ac.uk/data_request/cif), or by emailing [data\\_request@ccdc.cam.ac.uk](mailto:data_request@ccdc.cam.ac.uk), or by contacting The Cambridge Crystallographic Data Centre, 12, Union Road, Cambridge CB2 1EZ, UK; fax: +44 1223 336033.

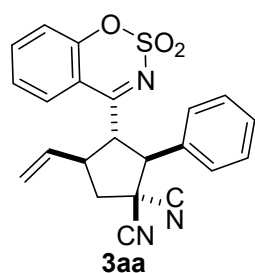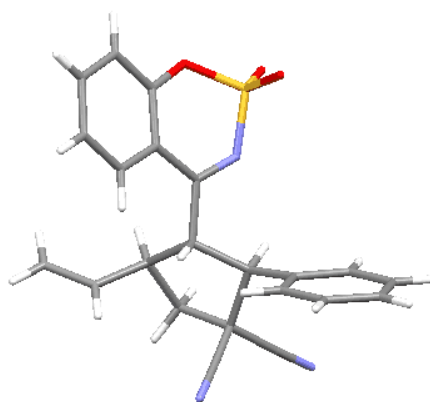

Table S1. Crystal data and structure refinement for **3aa**.

|                                 |                                                                                         |
|---------------------------------|-----------------------------------------------------------------------------------------|
| Identification code             | <b>3aa</b>                                                                              |
| Empirical formula               | C <sub>22</sub> H <sub>17</sub> N <sub>3</sub> O <sub>3</sub> S                         |
| Formula weight                  | 403.44                                                                                  |
| Temperature                     | 293(2) K                                                                                |
| Wavelength                      | 0.71073 Å                                                                               |
| Crystal system                  | Monoclinic                                                                              |
| Space group                     | P 1 21/n 1                                                                              |
| Unit cell dimensions            | a = 7.6209(15) Å a = 90°.<br>b = 12.073(2) Å b = 96.86(3)°.<br>c = 21.125(4) Å g = 90°. |
| Volume                          | 1929.8(7) Å <sup>3</sup>                                                                |
| Z                               | 4                                                                                       |
| Density (calculated)            | 1.389 Mg/m <sup>3</sup>                                                                 |
| Absorption coefficient          | 0.197 mm <sup>-1</sup>                                                                  |
| F(000)                          | 840                                                                                     |
| Theta range for data collection | 1.942 to 27.506°.                                                                       |

Index ranges  $-9 \leq h \leq 9$ ,  $-15 \leq k \leq 15$ ,  $-27 \leq l \leq 27$   
 Reflections collected 14264  
 Independent reflections 4390 [R(int) = 0.0568]  
 Completeness to  $\theta = 25.242^\circ$  99.4 %  
 Absorption correction None  
 Refinement method Full-matrix least-squares on F<sup>2</sup>  
 Data / restraints / parameters 4390 / 0 / 262  
 Goodness-of-fit on F<sup>2</sup> 1.225  
 Final R indices [ $I > 2\sigma(I)$ ] R1 = 0.0732, wR2 = 0.1259  
 R indices (all data) R1 = 0.0846, wR2 = 0.1307  
 Extinction coefficient n/a  
 Largest diff. peak and hole 0.269 and -0.332 e.Å<sup>-3</sup>

Table S2. Atomic coordinates ( $\times 10^4$ ) and equivalent isotropic displacement parameters ( $\text{\AA}^2 \times 10^3$ ) for **3aa**. U(eq) is defined as one third of the trace of the orthogonalized U<sub>ij</sub> tensor.

|    | x       | y       | z       | U(eq) |
|----|---------|---------|---------|-------|
| S1 | 7351(1) | 5078(1) | 4472(1) | 27(1) |
| O1 | 7202(2) | 4450(2) | 5127(1) | 31(1) |
| O2 | 6892(3) | 6189(2) | 4596(1) | 40(1) |
| O3 | 9006(2) | 4842(2) | 4264(1) | 37(1) |
| N1 | 5803(3) | 4529(2) | 3971(1) | 25(1) |
| N2 | 1001(3) | 5104(2) | 1761(1) | 32(1) |
| N3 | 1511(3) | 1595(2) | 2117(1) | 35(1) |
| C1 | 5367(3) | 3503(2) | 4029(1) | 21(1) |
| C2 | 6124(3) | 2798(2) | 4560(1) | 24(1) |
| C3 | 7070(3) | 3297(2) | 5094(1) | 29(1) |
| C4 | 7829(4) | 2703(3) | 5611(1) | 39(1) |
| C5 | 7656(4) | 1565(3) | 5598(1) | 45(1) |

C6 6733(4) 1031(3) 5079(1) 41(1)  
C7 5966(4) 1645(2) 4566(1) 31(1)  
C8 3958(3) 3066(2) 3529(1) 21(1)  
C9 3865(3) 3739(2) 2910(1) 22(1)  
C10 1902(3) 3579(2) 2615(1) 22(1)  
C11 896(4) 3705(2) 3205(1) 28(1)  
C12 2067(3) 3132(2) 3761(1) 25(1)  
C13 1375(4) 2021(2) 3923(1) 31(1)  
C14 925(4) 1744(3) 4480(2) 41(1)  
C15 1376(3) 4423(2) 2124(1) 22(1)  
C16 1647(3) 2467(2) 2325(1) 23(1)  
C17 5211(3) 3505(2) 2458(1) 23(1)  
C18 5835(4) 2442(2) 2351(1) 29(1)  
C19 6962(4) 2266(3) 1895(1) 38(1)  
C20 7483(4) 3134(3) 1538(1) 42(1)  
C21 6903(4) 4197(3) 1646(1) 39(1)  
C22 5784(3) 4379(2) 2105(1) 29(1)

---

Table S3. Bond lengths [Å] and angles [°] for **3aa**.

---

S1-O1 1.5935(19)  
S1-O2 1.418(2)  
S1-O3 1.413(2)  
S1-N1 1.629(2)  
O1-C3 1.397(3)  
N1-C1 1.293(3)  
N2-C15 1.137(3)

N3-C16 1.141(3)  
C1-C2 1.470(3)  
C1-C8 1.508(3)  
C2-C3 1.399(3)  
C2-C7 1.398(4)  
C3-C4 1.377(4)  
C4-H4 0.9300  
C4-C5 1.380(5)  
C5-H5 0.9300  
C5-C6 1.388(4)  
C6-H6 0.9300  
C6-C7 1.384(4)  
C7-H7 0.9300  
C8-H8 0.9800  
C8-C9 1.534(3)  
C8-C12 1.579(3)  
C9-H9 0.9800  
C9-C10 1.562(3)  
C9-C17 1.509(3)  
C10-C11 1.547(3)  
C10-C15 1.475(3)  
C10-C16 1.479(3)  
C11-H11A 0.9700  
C11-H11B 0.9700  
C11-C12 1.550(3)  
C12-H12 0.9800  
C12-C13 1.496(4)  
C13-H13 0.9300

C13-C14 1.308(4)  
C14-H14A 0.9300  
C14-H14B 0.9300  
C17-C18 1.397(4)  
C17-C22 1.393(4)  
C18-H18 0.9300  
C18-C19 1.381(4)  
C19-H19 0.9300  
C19-C20 1.377(4)  
C20-H20 0.9300  
C20-C21 1.385(5)  
C21-H21 0.9300  
C21-C22 1.383(4)  
C22-H22 0.9300

O1-S1-N1 104.42(11)  
O2-S1-O1 104.24(12)  
O2-S1-N1 109.16(12)  
O3-S1-O1 109.47(12)  
O3-S1-O2 119.84(13)  
O3-S1-N1 108.61(11)  
C3-O1-S1 116.25(16)  
C1-N1-S1 120.22(18)  
N1-C1-C2 123.0(2)  
N1-C1-C8 116.0(2)  
C2-C1-C8 120.9(2)  
C3-C2-C1 118.9(2)  
C7-C2-C1 123.8(2)

C7-C2-C3 117.3(2)  
O1-C3-C2 119.8(2)  
C4-C3-O1 117.3(2)  
C4-C3-C2 122.9(3)  
C3-C4-H4 120.9  
C3-C4-C5 118.2(3)  
C5-C4-H4 120.9  
C4-C5-H5 119.4  
C4-C5-C6 121.2(3)  
C6-C5-H5 119.4  
C5-C6-H6 120.1  
C7-C6-C5 119.7(3)  
C7-C6-H6 120.1  
C2-C7-H7 119.6  
C6-C7-C2 120.8(3)  
C6-C7-H7 119.6  
C1-C8-H8 109.0  
C1-C8-C9 111.6(2)  
C1-C8-C12 111.45(19)  
C9-C8-H8 109.0  
C9-C8-C12 106.63(19)  
C12-C8-H8 109.0  
C8-C9-H9 106.9  
C8-C9-C10 102.67(19)  
C10-C9-H9 106.9  
C17-C9-C8 118.3(2)  
C17-C9-H9 106.9  
C17-C9-C10 114.52(19)



C11-C10-C9 102.09(19)  
C15-C10-C9 111.2(2)  
C15-C10-C11 112.3(2)  
C15-C10-C16 109.0(2)  
C16-C10-C9 110.5(2)  
C16-C10-C11 111.7(2)  
C10-C11-H11A 110.6  
C10-C11-H11B 110.6  
C10-C11-C12 105.7(2)  
H11A-C11-H11B 108.7  
C12-C11-H11A 110.6  
C12-C11-H11B 110.6  
C8-C12-H12 108.9  
C11-C12-C8 104.61(19)  
C11-C12-H12 108.9  
C13-C12-C8 112.7(2)  
C13-C12-C11 112.7(2)  
C13-C12-H12 108.9  
C12-C13-H13 117.5  
C14-C13-C12 124.9(3)  
C14-C13-H13 117.5  
C13-C14-H14A 120.0  
C13-C14-H14B 120.0  
H14A-C14-H14B 120.0  
N2-C15-C10 177.4(3)  
N3-C16-C10 177.2(3)  
C18-C17-C9 123.1(2)  
C22-C17-C9 118.5(2)

|             |          |
|-------------|----------|
| C22-C17-C18 | 118.3(2) |
| C17-C18-H18 | 119.8    |
| C19-C18-C17 | 120.4(3) |
| C19-C18-H18 | 119.8    |
| C18-C19-H19 | 119.7    |
| C20-C19-C18 | 120.6(3) |
| C20-C19-H19 | 119.7    |
| C19-C20-H20 | 120.1    |
| C19-C20-C21 | 119.8(3) |
| C21-C20-H20 | 120.1    |
| C20-C21-H21 | 120.1    |
| C22-C21-C20 | 119.9(3) |
| C22-C21-H21 | 120.1    |
| C17-C22-H22 | 119.5    |
| C21-C22-C17 | 121.0(3) |
| C21-C22-H22 | 119.5    |

---

Symmetry transformations used to generate equivalent atoms:

Table S4. Anisotropic displacement parameters ( $\text{\AA}^2 \times 10^3$ ) for **3aa**. The anisotropic displacement factor exponent takes the form:  $-2p^2 [ h^2 a^*2U11 + \dots + 2 h k a^* b^* U12 ]$

---

|    | U11   | U22   | U33   | U23   | U13  | U12   |
|----|-------|-------|-------|-------|------|-------|
| S1 | 28(1) | 30(1) | 24(1) | -7(1) | 3(1) | -7(1) |
| O1 | 32(1) | 39(1) | 22(1) | -8(1) | 1(1) | -7(1) |

|     |       |       |       |           |       |        |
|-----|-------|-------|-------|-----------|-------|--------|
| O2  | 47(1) | 29(1) | 44(1) | -14(1)    | 3(1)  | -7(1)  |
| O3  | 30(1) | 51(1) | 30(1) | -10(1)    | 7(1)  | -10(1) |
| N1  | 26(1) | 24(1) | 24(1) | -3(1)     | -2(1) | -1(1)  |
| N2  | 34(1) | 25(1) | 34(1) | 5(1)-5(1) | 0(1)  |        |
| N3  | 41(1) | 26(1) | 36(1) | -2(1)     | -2(1) | -2(1)  |
| C1  | 22(1) | 23(1) | 18(1) | -3(1)     | 3(1)  | 1(1)   |
| C2  | 21(1) | 31(1) | 20(1) | 3(1)0(1)  | 0(1)  |        |
| C3  | 25(1) | 39(2) | 24(1) | 1(1)3(1)  | -2(1) |        |
| C4  | 32(2) | 62(2) | 23(1) | 5(1)-4(1) | -3(2) |        |
| C5  | 34(2) | 64(2) | 34(2) | 25(2)     | -5(1) | 0(2)   |
| C6  | 36(2) | 39(2) | 45(2) | 19(1)     | -4(1) | -4(1)  |
| C7  | 28(1) | 32(2) | 32(1) | 6(1)-3(1) | 0(1)  |        |
| C8  | 23(1) | 18(1) | 20(1) | -1(1)     | -1(1) | 0(1)   |
| C9  | 25(1) | 18(1) | 20(1) | -1(1)     | -2(1) | -1(1)  |
| C10 | 22(1) | 19(1) | 22(1) | 0(1)-1(1) | 1(1)  |        |
| C11 | 28(1) | 30(1) | 26(1) | 0(1)4(1)  | 4(1)  |        |
| C12 | 28(1) | 24(1) | 22(1) | -1(1)     | 3(1)  | 0(1)   |
| C13 | 31(2) | 28(1) | 33(1) | -2(1)     | 2(1)  | -2(1)  |
| C14 | 47(2) | 33(2) | 45(2) | 6(1)12(2) | -7(2) |        |
| C15 | 23(1) | 18(1) | 25(1) | -3(1)     | -2(1) | 0(1)   |
| C16 | 22(1) | 24(1) | 22(1) | 4(1)-2(1) | 1(1)  |        |
| C17 | 23(1) | 26(1) | 19(1) | -2(1)     | -3(1) | -3(1)  |
| C18 | 29(1) | 29(1) | 30(1) | -3(1)     | 4(1)  | 0(1)   |
| C19 | 31(2) | 44(2) | 39(2) | -13(1)    | 4(1)  | 4(1)   |
| C20 | 29(2) | 67(2) | 32(2) | -6(2)     | 7(1)  | -1(2)  |
| C21 | 29(2) | 54(2) | 34(2) | 11(1)     | 4(1)  | -7(1)  |
| C22 | 26(1) | 30(2) | 31(1) | 4(1)-1(1) | -1(1) |        |

Table S5. Hydrogen coordinates ( $\times 10^4$ ) and isotropic displacement parameters ( $\text{\AA}^2 \times 10^3$ ) for **3aa**.

---

|         | x    | y    | z    | U(eq) |
|---------|------|------|------|-------|
| H4      | 8442 | 3058 | 5961 | 47    |
| H5      | 8166 | 1149 | 5942 | 53    |
| H6      | 6631 | 263  | 5077 | 49    |
| H7      | 5337 | 1286 | 4221 | 37    |
| H8      | 4222 | 2293 | 3437 | 25    |
| H9      | 4000 | 4520 | 3033 | 26    |
| H11A    | -253 | 3351 | 3131 | 33    |
| H11B    | 729  | 4481 | 3300 | 33    |
| H122130 | 3608 | 4139 | 30   |       |
| H131255 | 1488 | 3603 | 37   |       |
| H14A    | 1026 | 2256 | 4811 | 49    |
| H14B    | 504  | 1035 | 4545 | 49    |
| H185489 | 1848 | 2587 | 35   |       |
| H197374 | 1556 | 1829 | 46   |       |
| H208222 | 3007 | 1226 | 51   |       |
| H217264 | 4787 | 1409 | 47   |       |
| H225409 | 5096 | 2179 | 35   |       |

---

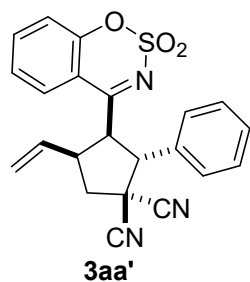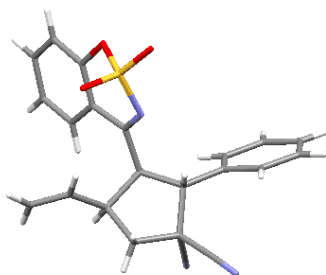

Table S6. Crystal data and structure refinement for **3aa'**.

Identification code **3aa'**

Empirical formula C<sub>22</sub> H<sub>17</sub> N<sub>3</sub> O<sub>3</sub> S

Formula weight 403.44

Temperature 293(2) K

Wavelength 0.71073 Å

Crystal system Triclinic

Space group P -1

Unit cell dimensions a = 8.2461(16) Å a = 104.17(3)°.

b = 10.300(2) Å b = 99.94(3)°.

c = 12.879(3) Å c = 105.52(3)°.

Volume 988.1(4) Å<sup>3</sup>

Z 2

Density (calculated) 1.356 Mg/m<sup>3</sup>

Absorption coefficient 0.193 mm<sup>-1</sup>

F(000) 420

Crystal size ? x ? x ? mm<sup>3</sup>

Theta range for data collection 1.687 to 27.470°.

Index ranges -10 ≤ h ≤ 10, -13 ≤ k ≤ 13, -16 ≤ l ≤ 16

Reflections collected 13604

Independent reflections 4495 [R(int) = 0.0431]

Completeness to theta = 25.242° 99.6 %

Absorption correction None

Refinement method Full-matrix least-squares on F<sup>2</sup>

Data / restraints / parameters 4495 / 12 / 262

Goodness-of-fit on F<sup>2</sup> 1.101

Final R indices [I > 2σ(I)] R<sub>1</sub> = 0.0567, wR<sub>2</sub> = 0.1206

R indices (all data) R<sub>1</sub> = 0.0642, wR<sub>2</sub> = 0.1254

Extinction coefficient n/a

Largest diff. peak and hole 0.430 and -0.350 e.Å<sup>-3</sup>

Table S7. Atomic coordinates (x 10<sup>4</sup>) and equivalent isotropic displacement parameters (Å<sup>2</sup> x 10<sup>3</sup>) for **3aa'**. U(eq) is defined as one third of the trace of the orthogonalized U<sub>ij</sub> tensor.

|     | x       | y       | z        | U(eq) |
|-----|---------|---------|----------|-------|
| S1  | 1766(1) | 3918(1) | 4279(1)  | 28(1) |
| O1  | 3526(2) | 3614(2) | 4112(1)  | 31(1) |
| O2  | 1651(2) | 4944(2) | 3736(1)  | 34(1) |
| O3  | 398(2)  | 2605(2) | 3940(1)  | 38(1) |
| N1  | 3973(3) | 6073(2) | 10584(2) | 43(1) |
| N2  | -335(3) | 7221(2) | 9281(2)  | 45(1) |
| N3  | 2119(2) | 4611(2) | 5611(1)  | 26(1) |
| C1  | 4257(3) | 2981(2) | 4831(2)  | 26(1) |
| C2  | 5259(3) | 2191(2) | 4445(2)  | 32(1) |
| C3  | 6106(3) | 1639(2) | 5159(2)  | 34(1) |
| C4  | 5932(3) | 1862(2) | 6237(2)  | 31(1) |
| C5  | 4932(3) | 2661(2) | 6610(2)  | 28(1) |
| C6  | 4062(2) | 3252(2) | 5914(2)  | 24(1) |
| C7  | 3060(2) | 4170(2) | 6275(2)  | 23(1) |
| C8  | 3024(3) | 4590(2) | 7480(2)  | 24(1) |
| C9  | 1696(3) | 3360(2) | 7731(2)  | 34(1) |
| C10 | 513(3)  | 4076(2) | 8291(2)  | 31(1) |
| C11 | 1604(3) | 5652(2) | 8782(2)  | 26(1) |
| C12 | 2483(2) | 5920(2) | 7836(2)  | 23(1) |
| C13 | 635(3)  | 2091(3) | 6774(2)  | 48(1) |

C14383(4) 782(3) 6761(4) 82(1)  
C153860(2) 7358(2) 8154(2) 24(1)  
C163314(3) 8514(2) 8089(2) 28(1)  
C174508(3) 9862(2) 8392(2) 35(1)  
C186259(3) 10076(2) 8752(2) 38(1)  
C196822(3) 8945(3) 8821(2) 41(1)  
C205627(3) 7595(2) 8530(2) 33(1)  
C212944(3) 5903(2) 9809(2) 30(1)  
C22527(3) 6555(2) 9055(2) 31(1)

---

Table S8. Bond lengths [Å] and angles [°] for **3aa'**.

---

S1-O1 1.6028(16)  
S1-O2 1.4172(15)  
S1-O3 1.4195(17)  
S1-N3 1.6288(18)  
O1-C1 1.400(2)  
N1-C21 1.136(3)  
N2-C22 1.139(3)  
N3-C7 1.300(2)  
C1-C2 1.377(3)  
C1-C6 1.399(3)  
C2-H2 0.9300  
C2-C3 1.380(3)

C3-H3 0.9300  
C3-C4 1.390(3)  
C4-H4 0.9300  
C4-C5 1.376(3)  
C5-H5 0.9300  
C5-C6 1.402(3)  
C6-C7 1.460(3)  
C7-C8 1.513(3)  
C8-H8 0.9800  
C8-C9 1.578(3)  
C8-C12 1.541(3)  
C9-H9 0.9800  
C9-C10 1.544(3)  
C9-C13 1.490(3)  
C10-H10A 0.9700  
C10-H10B 0.9700  
C10-C11 1.537(3)  
C11-C12 1.565(3)  
C11-C21 1.487(3)  
C11-C22 1.472(3)  
C12-H12 0.9800  
C12-C15 1.515(3)  
C13-H13 0.9300  
C13-C14 1.304(4)  
C14-H14A 0.9300



C14-H14B 0.9300

C15-C16 1.397(3)

C15-C20 1.387(3)

C16-H16 0.9300

C16-C17 1.386(3)

C17-H17 0.9300

C17-C18 1.378(3)

C18-H18 0.9300

C18-C19 1.380(3)

C19-H19 0.9300

C19-C20 1.389(3)

C20-H20 0.9300

O1-S1-N3 104.95(9)

O2-S1-O1 104.33(9)

O2-S1-O3 119.56(9)

O2-S1-N3 110.16(9)

O3-S1-O1 108.63(9)

O3-S1-N3 108.22(10)

C1-O1-S1 116.74(13)

C7-N3-S1 118.94(14)

C2-C1-O1 116.76(18)

C2-C1-C6 123.05(18)

C6-C1-O1 120.00(17)

C1-C2-H2 120.8

C1-C2-C3 118.4(2)  
C3-C2-H2 120.8  
C2-C3-H3 119.7  
C2-C3-C4 120.6(2)  
C4-C3-H3 119.7  
C3-C4-H4 120.0  
C5-C4-C3 120.09(19)  
C5-C4-H4 120.0  
C4-C5-H5 119.5  
C4-C5-C6 121.06(19)  
C6-C5-H5 119.5  
C1-C6-C5 116.74(18)  
C1-C6-C7 119.48(17)  
C5-C6-C7 123.71(18)  
N3-C7-C6 123.83(17)  
N3-C7-C8 117.02(17)  
C6-C7-C8 119.08(16)  
C7-C8-H8 108.5  
C7-C8-C9 110.71(16)  
C7-C8-C12 113.58(16)  
C9-C8-H8 108.5  
C12-C8-H8 108.5  
C12-C8-C9 106.82(16)  
C8-C9-H9 108.1  
C10-C9-C8 104.45(16)

C10-C9-H9 108.1  
C13-C9-C8 117.19(19)  
C13-C9-H9 108.1  
C13-C9-C10 110.66(19)  
C9-C10-H10A 110.7  
C9-C10-H10B 110.7  
H10A-C10-H10B 108.8  
C11-C10-C9 105.02(17)  
C11-C10-H10A 110.7  
C11-C10-H10B 110.7  
C10-C11-C12 102.00(16)  
C21-C11-C10 110.94(17)  
C21-C11-C12 110.52(16)  
C22-C11-C10 112.18(17)  
C22-C11-C12 113.20(17)  
C22-C11-C21 107.98(17)  
C8-C12-C11 102.23(15)  
C8-C12-H12 107.2  
C11-C12-H12 107.2  
C15-C12-C8 118.37(16)  
C15-C12-C11 114.00(16)  
C15-C12-H12 107.2  
C9-C13-H13 117.4  
C14-C13-C9 125.1(3)  
C14-C13-H13 117.4

C13-C14-H14A 120.0  
C13-C14-H14B 120.0  
H14A-C14-H14B 120.0  
C16-C15-C12 118.01(17)  
C20-C15-C12 123.67(18)  
C20-C15-C16 118.30(19)  
C15-C16-H16 119.6  
C17-C16-C15 120.75(19)  
C17-C16-H16 119.6  
C16-C17-H17 119.9  
C18-C17-C16 120.2(2)  
C18-C17-H17 119.9  
C17-C18-H18 120.1  
C17-C18-C19 119.8(2)  
C19-C18-H18 120.1  
C18-C19-H19 119.9  
C18-C19-C20 120.2(2)  
C20-C19-H19 119.9  
C15-C20-C19 120.8(2)  
C15-C20-H20 119.6  
C19-C20-H20 119.6  
N1-C21-C11178.7(2)  
N2-C22-C11177.7(2)

---

Symmetry transformations used to generate equivalent atoms:

Table S9. Anisotropic displacement parameters ( $\text{\AA}^2 \times 10^3$ ) for **3aa'**. The anisotropic displacement factor exponent takes the form:  $-2p2[h^2 a^*2U11 + \dots + 2 h k a^* b^* U12]$

---

|     | U11   | U22   | U33   | U23       | U13   | U12   |
|-----|-------|-------|-------|-----------|-------|-------|
| S1  | 30(1) | 28(1) | 20(1) | 5(1)-1(1) |       | 7(1)  |
| O1  | 39(1) | 36(1) | 20(1) | 9(1)6(1)  |       | 15(1) |
| O2  | 39(1) | 36(1) | 24(1) | 13(1)     | 0(1)  | 12(1) |
| O3  | 38(1) | 31(1) | 31(1) | 4(1)-5(1) |       | 0(1)  |
| N1  | 51(1) | 54(1) | 25(1) | 10(1)     | 3(1)  | 24(1) |
| N2  | 40(1) | 57(1) | 45(1) | 15(1)     | 14(1) | 25(1) |
| N3  | 28(1) | 26(1) | 20(1) | 6(1)2(1)  |       | 7(1)  |
| C1  | 31(1) | 24(1) | 20(1) | 5(1)1(1)  |       | 7(1)  |
| C2  | 39(1) | 29(1) | 25(1) | 4(1)10(1) |       | 10(1) |
| C3  | 35(1) | 28(1) | 37(1) | 5(1)9(1)  |       | 12(1) |
| C4  | 35(1) | 27(1) | 32(1) | 10(1)     | 4(1)  | 12(1) |
| C5  | 32(1) | 26(1) | 22(1) | 6(1)4(1)  |       | 9(1)  |
| C6  | 27(1) | 22(1) | 20(1) | 5(1)3(1)  |       | 7(1)  |
| C7  | 24(1) | 20(1) | 19(1) | 4(1)1(1)  |       | 3(1)  |
| C8  | 28(1) | 24(1) | 20(1) | 6(1)3(1)  |       | 10(1) |
| C9  | 40(1) | 30(1) | 34(1) | 14(1)     | 11(1) | 10(1) |
| C10 | 32(1) | 32(1) | 27(1) | 12(1)     | 7(1)  | 5(1)  |
| C11 | 27(1) | 31(1) | 20(1) | 8(1)4(1)  |       | 11(1) |
| C12 | 25(1) | 25(1) | 17(1) | 7(1)3(1)  |       | 8(1)  |
| C13 | 43(1) | 35(1) | 57(2) | 4(1)22(1) |       | 2(1)  |

|          |       |        |            |       |
|----------|-------|--------|------------|-------|
| C1459(2) | 31(2) | 140(4) | 8(2)22(2)  | 7(1)  |
| C1527(1) | 25(1) | 17(1)  | 4(1)4(1)   | 8(1)  |
| C1631(1) | 28(1) | 25(1)  | 6(1)4(1)   | 12(1) |
| C1744(1) | 28(1) | 35(1)  | 9(1)9(1)   | 14(1) |
| C1839(1) | 26(1) | 40(1)  | 6(1)3(1)   | 2(1)  |
| C1927(1) | 39(1) | 49(1)  | 11(1) 0(1) | 6(1)  |
| C2030(1) | 30(1) | 36(1)  | 11(1) 3(1) | 11(1) |
| C2138(1) | 34(1) | 20(1)  | 8(1)8(1)   | 16(1) |
| C2230(1) | 38(1) | 25(1)  | 11(1) 7(1) | 11(1) |

---

Table S10. Hydrogen coordinates ( $\times 10^4$ ) and isotropic displacement parameters ( $\text{\AA}^2 \times 10^3$ ) for **3aa'**.

---

|      | x    | y    | z    | U(eq) |
|------|------|------|------|-------|
| H2   | 5363 | 2034 | 3721 | 38    |
| H3   | 6801 | 1112 | 4916 | 41    |
| H4   | 6493 | 1471 | 6707 | 38    |
| H5   | 4830 | 2810 | 7334 | 33    |
| H8   | 4189 | 4772 | 7938 | 29    |
| H9   | 2350 | 3046 | 8275 | 41    |
| H10A | -544 | 3947 | 7753 | 38    |
| H10B | 200  | 3684 | 8868 | 38    |

|         |         |         |    |
|---------|---------|---------|----|
| H121567 | 5872    | 7218    | 27 |
| H13110  | 2245    | 6136    | 58 |
| H14A    | 886 584 | 7383    | 98 |
| H14B    | -299    | 45 6129 | 98 |
| H162135 | 8377    | 7839    | 34 |
| H174126 | 10624   | 8352    | 42 |
| H187060 | 10980   | 8948    | 46 |
| H198004 | 9088    | 9063    | 49 |
| H206016 | 6842    | 8588    | 39 |

---
